# Supplementary material for: O,S-Chelated bis(pentafluorophenyl)boron and diphenylboron-β-thioketonates: synthesis, photophysical, electrochemical and NLO properties
Source: Royal Society of Chemistry journal article supplement (doi:10.1039/d4dt02471k), 2024-01-01
Supplement: d4dt02471k1.pdf [file d4dt02471k1.pdf]

## Supporting Information

# O,S-Chelated bis(pentafluorophenyl)boron and diphenylboron- $\beta$ -thioketonates: Synthesis, photophysical, electrochemical and NLO properties

Anna Chandrasekar Murali,<sup>[a]</sup> Rudrashish Panda,<sup>[b]</sup> Ramkumar Kannan,<sup>[a]</sup> and Ritwick Das\*<sup>[b]</sup> Krishnan Venkatasubbaiah\*<sup>[a]</sup>

<sup>[a]</sup>School of Chemical Sciences, National Institute of Science Education and Research (NISER), an OCC of Homi Bhabha National Institute, Bhubaneswar-752050, Odisha, India.

<sup>[b]</sup>School of Physical Sciences, National Institute of Science Education and Research (NISER), an OCC of Homi Bhabha National Institute, Bhubaneswar-752050, Odisha, India.

\*E-mail: krishv@niser.ac.in

### General information:

All the reactions were carried out under N<sub>2</sub> atmosphere using standard glove box, Schlenk line and vacuum line techniques. Dry solvents used for the reactions were dried according to the standard procedures. All the reactions were monitored by thin-layer chromatography. Nuclear magnetic resonance spectra were recorded on a 400 MHz or 700 MHz Fourier transform NMR spectrometer (JEOL or Bruker) with CDCl<sub>3</sub> as a solvent. <sup>11</sup>B and <sup>19</sup>F NMR spectra were externally referenced to BF<sub>3</sub>.Et<sub>2</sub>O in CDCl<sub>3</sub> ( $\delta=0$  ppm) and  $\alpha,\alpha,\alpha$ -trifluoro toluene in CDCl<sub>3</sub> ( $\delta=-63.73$  ppm), respectively. Chemical shifts are reported in  $\delta$  ppm (parts per million) using residual solvent protons as the internal standard ( $\delta$  7.26 for CDCl<sub>3</sub> in <sup>1</sup>H NMR,  $\delta$  77.16 for CDCl<sub>3</sub> in <sup>13</sup>C NMR). Coupling constants are reported as J values in hertz (Hz). Splitting patterns are designated as s(singlet), d(doublet), t(triplet), q(quartet), dd(doublet of doublet), dt(doublet of triplet), m(multiplet) and br(broad). HRMS were recorded using Waters XEVO G2-XS QTOF mass spectrometer. UV – Visible spectra were recorded on Agilent Technologies Cary 60 UV/Visible spectrometer. Fluorescence spectra and absolute quantum yield were measured using Edinburgh spectrofluorimeter instrument FS5. For the measurement of absolute quantum yield, the concentration of the boron compounds was such as to give an absorbance of around 0.1 at excitation wavelength. Absolute total quantum yields were measured using an integrating sphere (Edinburgh instrument FS5) mounted in SC-30 compartment of the spectrofluorimeter. A Rigaku Super Nova fine-focused dual diffractometer, fitted with a PILATUS200K, was utilised to gather single crystal X-ray diffraction data using Cu K $\alpha$  radiation ( $\lambda = 1.54178$  Å). The structures were solved using Olex2 and the ShelXS structure solution program using Direct Methods. The ShelXL refinement tool

was then used to refine the structures using Least Squares minimization. Anisotropic displacement coefficients were utilised in the refinement of all non-hydrogen atoms. The H atoms were placed at calculated positions and were refined as riding atoms. The standard three electrode arrangement used for cyclic voltammetry included an Ag wire serving as the reference electrode, a Pt wire serving as the secondary electrode, and a glassy carbon working electrode. About  $1.0 \times 10^{-3}$  M solution in  $\text{CH}_2\text{Cl}_2$  with  $[\text{Bu}_4\text{N}][\text{PF}_6]$  (0.1 M) as a supporting electrolyte was used to record the voltammogram. The scans were referenced with a small amount of ferrocene as an internal standard. Starting materials: methyl benzodithioate was prepared according to the literature procedure.<sup>1</sup> Commercially available 4-methoxy acetophenone, 4-methyl acetophenone, acetophenone, 2-acetyl naphthalene, tris(pentafluorophenyl)borane, triphenylborane were purchased from Sigma-Aldrich, Spectrochem, Alfa-Aaser.

### **Z-Scan measurements**

The nonlinear optical characteristics were measured using an in-house developed single-beam Z-scan setup. A femtosecond Yb-doped fiber laser (Cazadero, M/S Calmar Inc., USA) is used as an excitation source for the nonlinear absorption (NLA) measurements. The laser delivers linearly polarized ultrashort pulses of width 370 fs at a central wavelength of 1030 nm. The pump laser is about 4 mm wide in the form of a symmetric Gaussian ( $\text{TEM}_{00}$ ) mode profile ( $M^2 < 1.05$ ). The Z-scan transmission measurements were carried out at a laser repetition rate fixed at 1 MHz. A plano-convex lens with a focal length of 100 mm is employed to focus the laser beam to a 32  $\mu\text{m}$  beam waist. The sample is moved symmetrically through the lens focus over a 50 mm distance using a motorized translation stage. A combination of half-wave plate and a cube beam splitter is positioned in front of the lens which controls the incident optical power on the prepared sample. The Z-scan measurements are carried out with the solution form of the prepared sample. A reference photodetector ( $\text{D}_1$ ) is records the variations in the excitation beam. In order to measure the open-aperture (OA) transmission, a second photodetector ( $\text{D}_2$ ) is used. The measurements from both the detectors are synchronised through a data-logger algorithm. The standard  $\text{CS}_2$  solvent is used to calibrate the OA Z-scan transmission measurements.

Figure S1 displays the OA Z-scan normalized transmittance curves for the compounds **2-8**. The red solid lines represent the theoretical fit to the observed experimental measurements. The black dots represent the experimental measurements. In order to ascertain the NLA coefficient

( $\beta$ ), we note that the normalized transmittance (T) depends on the samples translation distance (z) through the relation,

$$T(x) = 1 - \frac{\beta I_0 L_{eff}}{2^{\frac{3}{2}}(x^2+1)} \dots\dots\dots \text{Eq. (S6)}$$

where  $I_0$  is the on-axis peak intensity at the focal point,  $\alpha$  is the membrane's linear absorption coefficient, and  $L_{eff} = \frac{(1-e^{-\alpha L})}{\alpha}$  is the effective membrane thickness. The normalized propagation distance represented by  $x=z/z_0$  in the  $x$ -axis of the curve, where  $z_0$  is the Rayleigh range of the laser beam. It is important to note that Eq. S6 assumes that the translation length (z) is significantly longer as compared to the Rayleigh range of the Gaussian beam (> 10 times). In the present experimental set-up, the selection of excitation laser beam waist is governed by the constraint imposed by this assumption.

Additionally, we have performed the closed-aperture (CA) Z-scan experiment for ascertaining the applicability of the complexes for photonic switching applications. Figure S2 presents the measured normalized transmittance in CA Z-scan for compounds **2-8** (black dots). We adopt the following relation for analyzing the experimental measurements. A theoretical fitting to the experimental measurements<sup>2</sup> yields us a quantitative estimation of  $n_2$  which is tabulated in Table 5.

$$T(x) = 1 - \frac{4 \beta_0 x}{(x^2+9)(x^2+1)} - \frac{2(x^2+3) \beta_0}{(x^2+9)(x^2+1)} \dots\dots\dots \text{Eq. (S7)}$$

**Table S1.** Crystal data and structure refinement for Compound 1-3.

|                                             | <b>1</b>                                                          | <b>2</b>                                                      | <b>3</b>                                                      |
|---------------------------------------------|-------------------------------------------------------------------|---------------------------------------------------------------|---------------------------------------------------------------|
| Empirical formula                           | C <sub>28</sub> H <sub>13</sub> BF <sub>10</sub> O <sub>2</sub> S | C <sub>28</sub> H <sub>13</sub> BF <sub>10</sub> OS           | C <sub>27</sub> H <sub>11</sub> BF <sub>10</sub> OS           |
| Formula weight                              | 614.25                                                            | 598.25                                                        | 584.23                                                        |
| Temperature/K                               | 100.00(10)                                                        | 100.00(10)                                                    | 100.00(10)                                                    |
| Crystal system                              | triclinic                                                         | triclinic                                                     | triclinic                                                     |
| Space group                                 | P-1                                                               | P-1                                                           | P-1                                                           |
| a/Å                                         | 8.88200(10)                                                       | 9.0473(3)                                                     | 9.3857(2)                                                     |
| b/Å                                         | 11.7045(2)                                                        | 11.9367(3)                                                    | 10.9581(4)                                                    |
| c/Å                                         | 14.6627(3)                                                        | 12.7968(5)                                                    | 12.3752(4)                                                    |
| α/°                                         | 71.659(2)                                                         | 112.846(3)                                                    | 72.326(3)                                                     |
| β/°                                         | 81.2320(10)                                                       | 104.805(4)                                                    | 70.919(2)                                                     |
| γ/°                                         | 76.3720(10)                                                       | 93.529(3)                                                     | 76.257(3)                                                     |
| Volume/Å <sup>3</sup>                       | 1401.08(4)                                                        | 1211.08(8)                                                    | 1132.48(7)                                                    |
| Z                                           | 2                                                                 | 2                                                             | 2                                                             |
| ρ <sub>calc</sub> /g/cm <sup>3</sup>        | 1.456                                                             | 1.641                                                         | 1.713                                                         |
| μ/mm <sup>-1</sup>                          | 1.874                                                             | 2.117                                                         | 2.248                                                         |
| F(000)                                      | 616.0                                                             | 600.0                                                         | 584.0                                                         |
| Crystal size/mm <sup>3</sup>                | 0.12 × 0.1 × 0.09                                                 | 0.12 × 0.11 × 0.1                                             | 0.12 × 0.11 × 0.1                                             |
| Radiation                                   | CuKα (λ = 1.54184)                                                | CuKα (λ = 1.54184)                                            | CuKα (λ = 1.54184)                                            |
| 2θ range for data collection/°              | 8.122 to 156.224                                                  | 7.868 to 157.426                                              | 7.8 to 156.122                                                |
| Index ranges                                | -11 ≤ h ≤ 8, -14 ≤ k ≤ 14, -18 ≤ l ≤ 17                           | -11 ≤ h ≤ 10, -15 ≤ k ≤ 14, -16 ≤ l ≤ 15                      | -11 ≤ h ≤ 10, -13 ≤ k ≤ 13, -15 ≤ l ≤ 15                      |
| Reflections collected                       | 22444                                                             | 18134                                                         | 18114                                                         |
| Independent reflections                     | 5864 [R <sub>int</sub> = 0.0424, R <sub>sigma</sub> = 0.0264]     | 5052 [R <sub>int</sub> = 0.0496, R <sub>sigma</sub> = 0.0271] | 4725 [R <sub>int</sub> = 0.0287, R <sub>sigma</sub> = 0.0199] |
| Data/restraints/parameters                  | 5864/0/380                                                        | 5052/0/372                                                    | 4725/0/362                                                    |
| Goodness-of-fit on F <sup>2</sup>           | 1.085                                                             | 1.038                                                         | 1.043                                                         |
| Final R indexes [I ≥ 2σ (I)]                | R <sub>1</sub> = 0.0398, wR <sub>2</sub> = 0.1133                 | R <sub>1</sub> = 0.0558, wR <sub>2</sub> = 0.1540             | R <sub>1</sub> = 0.0348, wR <sub>2</sub> = 0.0905             |
| Final R indexes [all data]                  | R <sub>1</sub> = 0.0411, wR <sub>2</sub> = 0.1145                 | R <sub>1</sub> = 0.0578, wR <sub>2</sub> = 0.1564             | R <sub>1</sub> = 0.0358, wR <sub>2</sub> = 0.0916             |
| Largest diff. peak/hole / e Å <sup>-3</sup> | 0.37/-0.52                                                        | 0.52/-0.48                                                    | 0.43/-0.27                                                    |

**Table S2.** Crystal data and structure refinement for Compound 4 and 5.

|                                             | <b>4</b>                                                      | <b>5</b>                                                      |
|---------------------------------------------|---------------------------------------------------------------|---------------------------------------------------------------|
| Empirical formula                           | C <sub>31</sub> H <sub>13</sub> BF <sub>10</sub> OS           | C <sub>28</sub> H <sub>23</sub> BO <sub>2</sub> S             |
| Formula weight                              | 634.28                                                        | 434.33                                                        |
| Temperature/K                               | 109(13)                                                       | 100.01(10)                                                    |
| Crystal system                              | triclinic                                                     | monoclinic                                                    |
| Space group                                 | P-1                                                           | P2 <sub>1</sub> /c                                            |
| a/Å                                         | 8.9743(4)                                                     | 8.3139(2)                                                     |
| b/Å                                         | 11.7030(4)                                                    | 19.4235(6)                                                    |
| c/Å                                         | 15.0237(4)                                                    | 13.8886(4)                                                    |
| α/°                                         | 74.848(3)                                                     | 90                                                            |
| β/°                                         | 82.963(3)                                                     | 98.258(3)                                                     |
| γ/°                                         | 71.503(4)                                                     | 90                                                            |
| Volume/Å <sup>3</sup>                       | 1443.00(10)                                                   | 2219.55(11)                                                   |
| Z                                           | 2                                                             | 4                                                             |
| ρ <sub>calc</sub> /cm <sup>3</sup>          | 1.460                                                         | 1.300                                                         |
| μ/mm <sup>-1</sup>                          | 1.814                                                         | 1.469                                                         |
| F(000)                                      | 636.0                                                         | 912.0                                                         |
| Crystal size/mm <sup>3</sup>                | 0.14 × 0.12 × 0.11                                            | 0.12 × 0.1 × 0.09                                             |
| Radiation                                   | CuKα (λ = 1.54184)                                            | CuKα (λ = 1.54184)                                            |
| 2θ range for data collection/°              | 8.198 to 152.024                                              | 7.88 to 156.492                                               |
| Index ranges                                | -11 ≤ h ≤ 11, -14 ≤ k ≤ 14, -18 ≤ l ≤ 14                      | -10 ≤ h ≤ 10, -24 ≤ k ≤ 23, -17 ≤ l ≤ 17                      |
| Reflections collected                       | 19128                                                         | 17918                                                         |
| Independent reflections                     | 5833 [R <sub>int</sub> = 0.0991, R <sub>sigma</sub> = 0.0570] | 4652 [R <sub>int</sub> = 0.0448, R <sub>sigma</sub> = 0.0366] |
| Data/restraints/parameters                  | 5833/0/397                                                    | 4652/0/290                                                    |
| Goodness-of-fit on F <sup>2</sup>           | 1.096                                                         | 1.067                                                         |
| Final R indexes [I >= 2σ (I)]               | R <sub>1</sub> = 0.0893, wR <sub>2</sub> = 0.2742             | R <sub>1</sub> = 0.0396, wR <sub>2</sub> = 0.1015             |
| Final R indexes [all data]                  | R <sub>1</sub> = 0.0978, wR <sub>2</sub> = 0.2816             | R <sub>1</sub> = 0.0480, wR <sub>2</sub> = 0.1052             |
| Largest diff. peak/hole / e Å <sup>-3</sup> | 0.65/-0.84                                                    | 0.38/-0.31                                                    |

**Table S3.** Comparison of bond lengths, bond angles, and other structural data for compounds 1-4 (DFT optimized).

|                                                       | <b>1</b> | <b>2</b> | <b>3</b> | <b>4</b> |
|-------------------------------------------------------|----------|----------|----------|----------|
| <b>S-C1 (Å)</b>                                       | 1.729    | 1.726    | 1.724    | 1.726    |
| <b>O-C3 (Å)</b>                                       | 1.307    | 1.305    | 1.304    | 1.304    |
| <b>B-S (Å)</b>                                        | 1.971    | 1.973    | 1.973    | 1.972    |
| <b>B-O (Å)</b>                                        | 1.497    | 1.498    | 1.499    | 1.499    |
| <b>B-C4 (Å)</b>                                       | 1.644    | 1.643    | 1.642    | 1.643    |
| <b>B-C5 (Å)</b>                                       | 1.627    | 1.627    | 1.626    | 1.627    |
| <b>C1-C2 (Å)</b>                                      | 1.389    | 1.392    | 1.394    | 1.392    |
| <b>C2-C3 (Å)</b>                                      | 1.412    | 1.408    | 1.406    | 1.407    |
| <b>S-B-O (deg)</b>                                    | 105.28   | 105.25   | 105.30   | 105.35   |
| <b>S-B-C4 (deg)</b>                                   | 115.18   | 115.14   | 115.18   | 115.22   |
| <b>O-B-C5 (deg)</b>                                   | 110.35   | 110.38   | 110.44   | 110.42   |
| <b>C4-B-C5 (deg)</b>                                  | 110.69   | 110.80   | 110.90   | 110.89   |
| <b>C1-C2-C3 (deg)</b>                                 | 124.0    | 123.91   | 123.88   | 123.89   |
| <b>Deviation of B from C<sub>3</sub>SOB plane (Å)</b> | 0.347    | 0.344    | 0.340    | 0.342    |

**Table S4.** Comparison of bond lengths, bond angles, and other structural data for compounds 5-8 (DFT optimized).

|                                                       | <b>5</b> | <b>6</b> | <b>7</b> | <b>8</b> |
|-------------------------------------------------------|----------|----------|----------|----------|
| <b>S-C1 (Å)</b>                                       | 1.729    | 1.726    | 1.724    | 1.726    |
| <b>O-C3 (Å)</b>                                       | 1.303    | 1.302    | 1.301    | 1.301    |
| <b>B-S (Å)</b>                                        | 2.007    | 2.010    | 2.010    | 2.010    |
| <b>B-O (Å)</b>                                        | 1.517    | 1.518    | 1.518    | 1.519    |
| <b>B-C4 (Å)</b>                                       | 1.617    | 1.616    | 1.616    | 1.616    |
| <b>B-C5 (Å)</b>                                       | 1.612    | 1.612    | 1.612    | 1.612    |
| <b>C1-C2 (Å)</b>                                      | 1.390    | 1.393    | 1.395    | 1.394    |
| <b>C2-C3 (Å)</b>                                      | 1.413    | 1.410    | 1.408    | 1.409    |
| <b>S-B-O (deg)</b>                                    | 104.59   | 104.49   | 104.42   | 104.47   |
| <b>S-B-C4 (deg)</b>                                   | 110.58   | 110.40   | 110.36   | 110.41   |
| <b>O-B-C5 (deg)</b>                                   | 108.12   | 108.08   | 108.14   | 108.10   |
| <b>C4-B-C5 (deg)</b>                                  | 116.00   | 116.27   | 116.30   | 116.28   |
| <b>C1-C2-C3 (deg)</b>                                 | 124.66   | 124.57   | 124.50   | 124.49   |
| <b>Deviation of B from C<sub>3</sub>SOB plane (Å)</b> | 0.343    | 0.340    | 0.340    | 0.341    |

**Table S5.** Photophysical data of compounds 1-8 at 298K

| <b>Complexes</b> | <b>Solvent</b>                  | $\lambda_{\text{abs}}^a$ /nm ( $\epsilon \times 10^4/\text{M}^{-1} \text{cm}^{-1}$ ) | $\lambda_{\text{ems}}^b$ (nm) | <b>Stokes Shift (<math>\text{cm}^{-1}</math>)</b> | $\Phi_{\text{F}}^c$ (%) | $\tau^d$ (ns) |
|------------------|---------------------------------|--------------------------------------------------------------------------------------|-------------------------------|---------------------------------------------------|-------------------------|---------------|
| <b>1</b>         | Toluene                         | 356(1.3), 461(2.6)                                                                   | 538                           | 3104                                              | -                       | -             |
|                  | THF                             | 355(1.5), 461(3.0)                                                                   | 533                           | 2930                                              | -                       | -             |
|                  | CH <sub>2</sub> Cl <sub>2</sub> | 353(1.5), 458(3.0)                                                                   | 534                           | 3108                                              | 0.12                    | 0.23          |
|                  | CH <sub>3</sub> CN              | 351(1.8), 457(3.4)                                                                   | 542                           | 3431                                              | -                       | -             |
|                  | Solid                           | -                                                                                    | 564                           | -                                                 | -                       | -             |
| <b>2</b>         | Toluene                         | 347(1.7), 451(2.1)                                                                   | 568                           | 4567                                              | -                       | -             |
|                  | THF                             | 347(1.9), 450(2.2)                                                                   | 553                           | 4139                                              | -                       | -             |
|                  | CH <sub>2</sub> Cl <sub>2</sub> | 345(1.8), 448(2.2)                                                                   | 551                           | 4173                                              | 0.11                    | 0.41          |
|                  | CH <sub>3</sub> CN              | 344(1.9), 446(2.3)                                                                   | 521                           | 3228                                              | -                       | -             |
|                  | Solid                           | -                                                                                    | 554                           | -                                                 | -                       | -             |
| <b>3</b>         | Toluene                         | 346(1.6), 448(1.7)                                                                   | 569                           | 4747                                              | -                       | -             |
|                  | THF                             | 346(1.8), 446(1.8)                                                                   | 560                           | 4564                                              | -                       | -             |
|                  | CH <sub>2</sub> Cl <sub>2</sub> | 344(1.9), 445(1.9)                                                                   | 557                           | 4518                                              | 0.10                    | 0.59          |
|                  | CH <sub>3</sub> CN              | 341(1.9), 442(1.9)                                                                   | 551                           | 4476                                              | -                       | -             |
|                  | Solid                           | -                                                                                    | 614                           | -                                                 | -                       | -             |
| <b>4</b>         | Toluene                         | 349(1.5), 465(2.3)                                                                   | 555                           | 3487                                              | -                       | -             |
|                  | THF                             | 350(2.0), 466(2.8)                                                                   | 537                           | 2838                                              | -                       | -             |
|                  | CH <sub>2</sub> Cl <sub>2</sub> | 348(1.8), 463(2.7)                                                                   | 549                           | 3384                                              | 0.14                    | 0.35          |
|                  | CH <sub>3</sub> CN              | 346(2.1), 462(3.0)                                                                   | 531                           | 2813                                              | -                       | -             |
|                  | Solid                           | -                                                                                    | 617                           | -                                                 | -                       | -             |
| <b>5</b>         | Toluene                         | 348(1.5), 468(1.8)                                                                   | -                             | -                                                 | -                       | -             |
|                  | THF                             | 347(1.7), 464(2.0)                                                                   | -                             | -                                                 | -                       | -             |
|                  | CH <sub>2</sub> Cl <sub>2</sub> | 346(1.6), 465(2.1)                                                                   | -                             | -                                                 | -                       | -             |
|                  | CH <sub>3</sub> CN              | 341(1.4), 457(1.8)                                                                   | -                             | -                                                 | -                       | -             |
| <b>6</b>         | Toluene                         | 335(1.5), 463(1.6)                                                                   | -                             | -                                                 | -                       | -             |
|                  | THF                             | 335(1.7), 455(1.2)                                                                   | -                             | -                                                 | -                       | -             |
|                  | CH <sub>2</sub> Cl <sub>2</sub> | 336(1.7), 455(1.3)                                                                   | -                             | -                                                 | -                       | -             |
|                  | CH <sub>3</sub> CN              | 332(1.6), 432(1.3)                                                                   | -                             | -                                                 | -                       | -             |
| <b>7</b>         | Toluene                         | 333(1.5), 461(1.0)                                                                   | -                             | -                                                 | -                       | -             |
|                  | THF                             | 332(1.5), 419(1.1)                                                                   | -                             | -                                                 | -                       | -             |
|                  | CH <sub>2</sub> Cl <sub>2</sub> | 334(1.5), 455(1.0)                                                                   | -                             | -                                                 | -                       | -             |



|          |                                 |                    |   |   |   |   |
|----------|---------------------------------|--------------------|---|---|---|---|
|          | CH <sub>3</sub> CN              | 329(1.4), 413(1.4) | - | - | - | - |
| <b>8</b> | Toluene                         | 339(1.7), 472(1.6) | - | - | - | - |
|          | THF                             | 336(1.7), 447(1.5) | - | - | - | - |
|          | CH <sub>2</sub> Cl <sub>2</sub> | 337(1.6), 467(1.6) | - | - | - | - |
|          | CH <sub>3</sub> CN              | 334(1.5), 431(1.6) | - | - | - | - |

<sup>a</sup>Absorption maximum (concentration = 3.5 x 10<sup>-5</sup> M), <sup>b</sup>excited at  $\lambda_{\max}$ , <sup>c</sup>relative quantum yield using integrating sphere module, <sup>d</sup>emission lifetime.

**Table S6.** Calculated electronic transitions for compounds **1-8** from TD-DFT (B3LYP (6-31G(d,p)) calculations

| Compounds   | Transition                     | MO contributions | Energy gap<br>eV (nm) | Oscillator<br>strength/f |
|-------------|--------------------------------|------------------|-----------------------|--------------------------|
| <b>1</b>    | S <sub>0</sub> →S <sub>1</sub> | HOMO→LUMO        | 2.92 (424)            | 0.6505                   |
|             | S <sub>0</sub> →S <sub>2</sub> | HOMO-2→LUMO      | 3.21 (385)            | 0.0010                   |
|             |                                | HOMO-1→LUMO      |                       |                          |
|             | S <sub>0</sub> →S <sub>3</sub> | HOMO-3→LUMO      | 3.29 (376)            | 0.0013                   |
| HOMO-2→LUMO |                                |                  |                       |                          |
| <b>2</b>    | S <sub>0</sub> →S <sub>1</sub> | HOMO→LUMO        | 3.01 (411)            | 0.4975                   |
|             | S <sub>0</sub> →S <sub>2</sub> | HOMO-2→LUMO      | 3.14 (394)            | 0.0059                   |
|             |                                | HOMO-1→LUMO      |                       |                          |
|             | S <sub>0</sub> →S <sub>3</sub> | HOMO-3→LUMO      | 3.21 (385)            | 0.0012                   |
|             |                                | HOMO-2→LUMO      |                       |                          |
| HOMO-1→LUMO |                                |                  |                       |                          |
| <b>3</b>    | S <sub>0</sub> →S <sub>1</sub> | HOMO→LUMO        | 3.05 (406)            | 0.3532                   |
|             |                                | HOMO-1→LUMO      |                       |                          |

|          |                                |                                           |            |        |
|----------|--------------------------------|-------------------------------------------|------------|--------|
|          | S <sub>0</sub> →S <sub>2</sub> | HOMO-2→LUMO<br>HOMO-1→LUMO<br>HOMO→LUMO   | 3.10 (399) | 0.0414 |
|          | S <sub>0</sub> →S <sub>3</sub> | HOMO-3→LUMO<br>HOMO-2→LUMO<br>HOMO-1→LUMO | 3.16 (391) | 0.0011 |
| <b>4</b> | S <sub>0</sub> →S <sub>1</sub> | HOMO→LUMO                                 | 2.70 (459) | 0.3147 |
|          | S <sub>0</sub> →S <sub>2</sub> | HOMO-1→LUMO                               | 3.06 (404) | 0.2948 |
|          | S <sub>0</sub> →S <sub>3</sub> | HOMO-3→LUMO<br>HOMO-2→LUMO                | 3.10 (399) | 0.0375 |
| <b>5</b> | S <sub>0</sub> →S <sub>1</sub> | HOMO-2→LUMO<br>HOMO-1→LUMO<br>HOMO→LUMO   | 2.88 (430) | 0.1595 |
|          | S <sub>0</sub> →S <sub>2</sub> | HOMO-2→LUMO<br>HOMO→LUMO                  | 2.92 (424) | 0.3601 |
|          | S <sub>0</sub> →S <sub>3</sub> | HOMO-2→LUMO<br>HOMO-1→LUMO                | 2.94 (420) | 0.0188 |
| <b>6</b> | S <sub>0</sub> →S <sub>1</sub> | HOMO-2→LUMO<br>HOMO-1→LUMO<br>HOMO →LUMO  | 2.81 (440) | 0.0129 |
|          | S <sub>0</sub> →S <sub>2</sub> | HOMO-2→LUMO<br>HOMO-1→LUMO<br>HOMO→LUMO   | 2.88 (429) | 0.0044 |
|          | S <sub>0</sub> →S <sub>3</sub> | HOMO-2→LUMO                               | 2.95 (419) | 0.3217 |

|            |       |                          |            |        |
|------------|-------|--------------------------|------------|--------|
|            |       | HOMO-1→LUMO<br>HOMO→LUMO |            |        |
| <b>7</b>   | S0→S1 | HOMO-2→LUMO              | 2.78 (445) | 0.0075 |
|            |       | HOMO →LUMO               |            |        |
|            | S0→S2 | HOMO-2→LUMO              | 2.84 (436) | 0.0034 |
|            |       | HOMO-1→LUMO              |            |        |
|            |       | HOMO→LUMO                |            |        |
|            | S0→S3 | HOMO-4→LUMO              | 2.96 (418) | 0.2198 |
|            |       | HOMO-2→LUMO              |            |        |
|            |       | HOMO-1→LUMO              |            |        |
| HOMO→ LUMO |       |                          |            |        |
| <b>8</b>   | S0→S1 | HOMO-2→LUMO              | 2.74 (452) | 0.3270 |
|            |       | HOMO→ LUMO               |            |        |
|            | S0→S2 | HOMO-2→LUMO              | 2.79 (443) | 0.0488 |
|            |       | HOMO-1→LUMO              |            |        |
|            |       | HOMO→LUMO                |            |        |
|            | S0→S3 | HOMO-2→LUMO              | 2.84 (435) | 0.0037 |
|            |       | HOMO-1→LUMO              |            |        |

**Table S7.** Computed orbitals for compounds **1** and **2**.

| <b>Compound</b> | 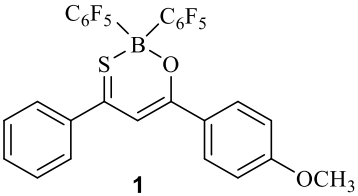<br><b>1</b>    | <br><b>2</b>    |
|-----------------|--------------------------------------------------------------------------------------------------|---------------------------------------------------------------------------------------------------|
| LUMO+2          | <br>-0.7210 eV  | <br>-0.7376 eV  |
| LUMO+1          | <br>-0.9987 eV | <br>-1.067 eV  |
| LUMO            | <br>-2.913 eV | <br>-2.998 eV |

|        |                                                                                                  |                                                                                                  |
|--------|--------------------------------------------------------------------------------------------------|--------------------------------------------------------------------------------------------------|
| HOMO   | 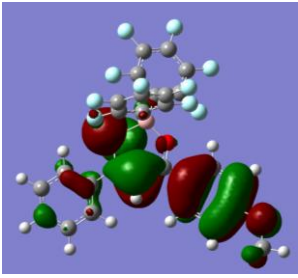<br>-6.212 eV   | <br>-6.442 eV  |
| HOMO-1 | <br>-6.6822 eV  | <br>-6.694 eV  |
| HOMO-2 | <br>-6.7366 eV | <br>-6.747 eV |

**Table S8.** Computed orbitals for compounds **3** and **4**.

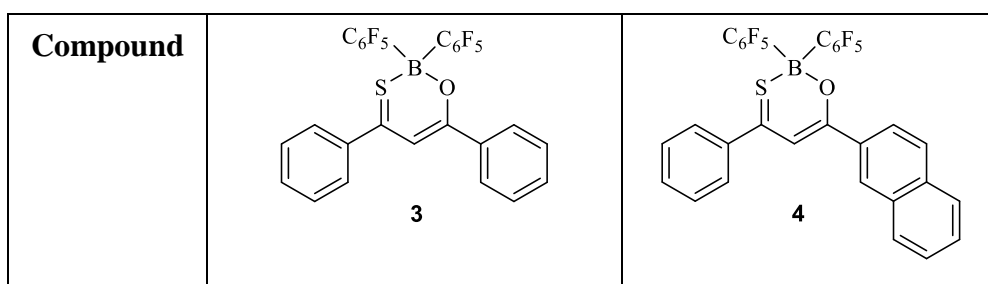

|        |                                                                                                      |                                                                                                       |
|--------|------------------------------------------------------------------------------------------------------|-------------------------------------------------------------------------------------------------------|
| LUMO+2 | 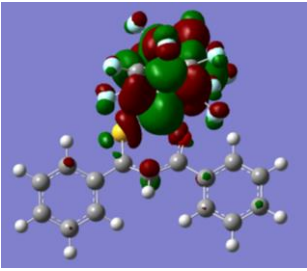 <p>-0.745 eV</p>   |  <p>-0.893 eV</p>   |
| LUMO+1 | <p>-1.112 eV</p>    |  <p>-1.502 eV</p>   |
| LUMO   |  <p>-3.046 eV</p> |  <p>-3.056 eV</p> |
| HOMO   |  <p>-6.539 eV</p> |  <p>-6.187 eV</p> |

|        |                                                                                                    |                                                                                                     |
|--------|----------------------------------------------------------------------------------------------------|-----------------------------------------------------------------------------------------------------|
| HOMO-1 | 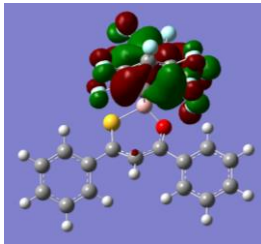 <p>-6.700 eV</p> |  <p>-6.636 eV</p> |
| HOMO-2 |  <p>-6.756 eV</p> |  <p>-6.699 eV</p> |

**Table S9.** Computed orbitals for compounds **5** and **6**.

|                 |                                                                                                      |                                                                                                       |
|-----------------|------------------------------------------------------------------------------------------------------|-------------------------------------------------------------------------------------------------------|
| <b>Compound</b> | 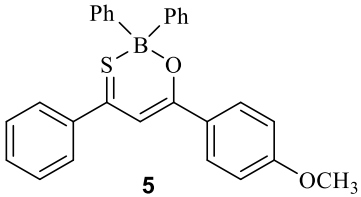 <p><b>5</b></p>  |  <p><b>6</b></p>  |
| LUMO+2          |  <p>-0.472 eV</p> |  <p>-0.419 eV</p> |

|        |                                                                                                      |                                                                                                       |
|--------|------------------------------------------------------------------------------------------------------|-------------------------------------------------------------------------------------------------------|
| LUMO+1 | 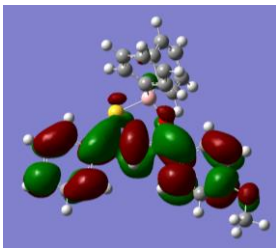 <p>-0.937 eV</p>   |  <p>-1.010 eV</p>   |
| LUMO   |  <p>-2.811 eV</p>   |  <p>-2.892 eV</p>   |
| HOMO   |  <p>-6.132 eV</p>  |  <p>-6.302 eV</p>  |
| HOMO-1 |  <p>-6.351 eV</p> |  <p>-6.380 eV</p> |



|        |                                                                                                                                |                                                                                                                                   |
|--------|--------------------------------------------------------------------------------------------------------------------------------|-----------------------------------------------------------------------------------------------------------------------------------|
| HOMO-2 | 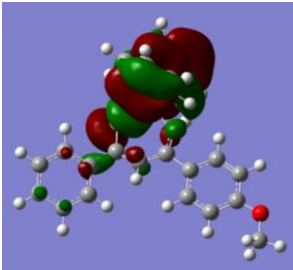 <p data-bbox="639 501 772 533">-6.392 eV</p> |  <p data-bbox="1038 483 1171 515">-6.404 eV</p> |
|--------|--------------------------------------------------------------------------------------------------------------------------------|-----------------------------------------------------------------------------------------------------------------------------------|

**Table S10.** Computed orbitals for compounds **7** and **8**.

|                 |                                                                                                                                    |                                                                                                                                       |
|-----------------|------------------------------------------------------------------------------------------------------------------------------------|---------------------------------------------------------------------------------------------------------------------------------------|
| <b>Compound</b> | 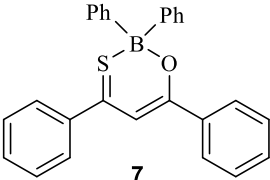 <p data-bbox="699 913 715 945"><b>7</b></p>      |  <p data-bbox="1082 913 1098 945"><b>8</b></p>      |
| LUMO+2          |  <p data-bbox="639 1335 772 1366">-0.442 eV</p> |  <p data-bbox="1038 1335 1171 1366">-0.864 eV</p> |
| LUMO+1          |  <p data-bbox="639 1709 772 1740">-1.055 eV</p> |  <p data-bbox="1038 1709 1171 1740">-1.476 eV</p> |

|        |                                                                                                      |                                                                                                       |
|--------|------------------------------------------------------------------------------------------------------|-------------------------------------------------------------------------------------------------------|
| LUMO   | 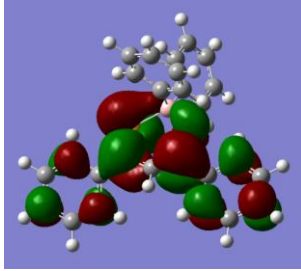 <p>-2.941 eV</p>   |  <p>-2.947 eV</p>   |
| HOMO   |  <p>-6.361 eV</p>   |  <p>-6.130 eV</p>   |
| HOMO-1 |  <p>-6.394 eV</p>  |  <p>-6.377 eV</p>  |
| HOMO-2 |  <p>-6.421 eV</p> |  <p>-6.410 eV</p> |

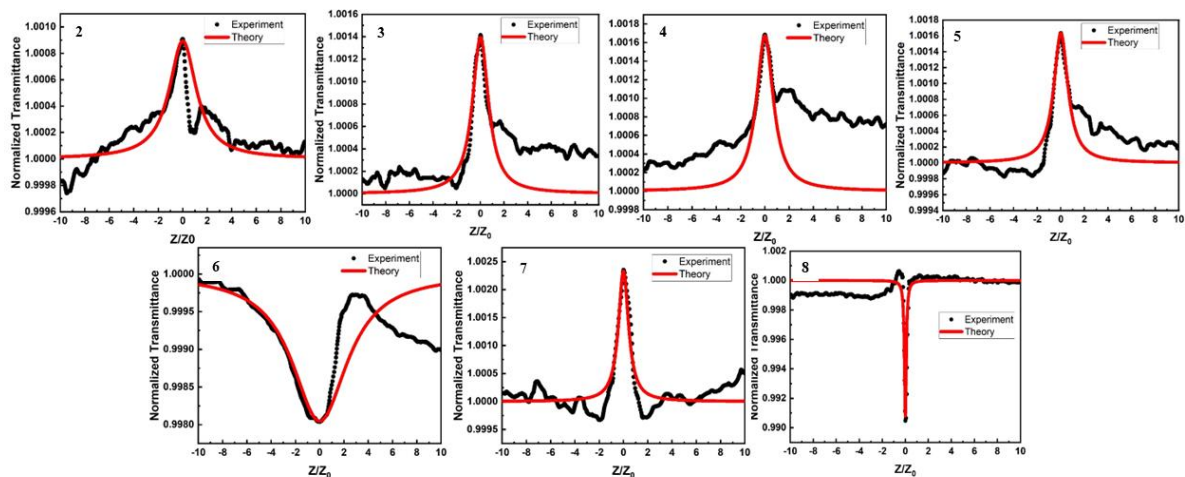

**Figure S1.** Measured normalized transmittance (black dotted curve) as a function of sample position ( $z$ ) for open-aperture Z-scan experiment for compounds 2-8. The red solid-curves are theoretical fits as per Eq. (S6)

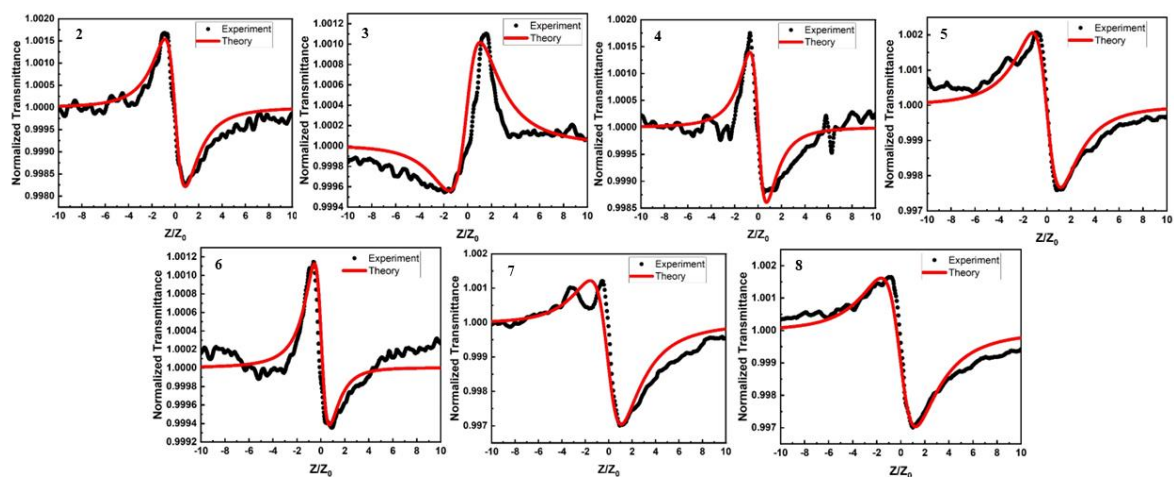

**Figure S2.** Measured normalized transmittance (black dotted curve) as a function of sample position for closed-aperture Z-scan experiment for the compounds 2-8. The red solid-curves are theoretical fits as per Eq. (S7)

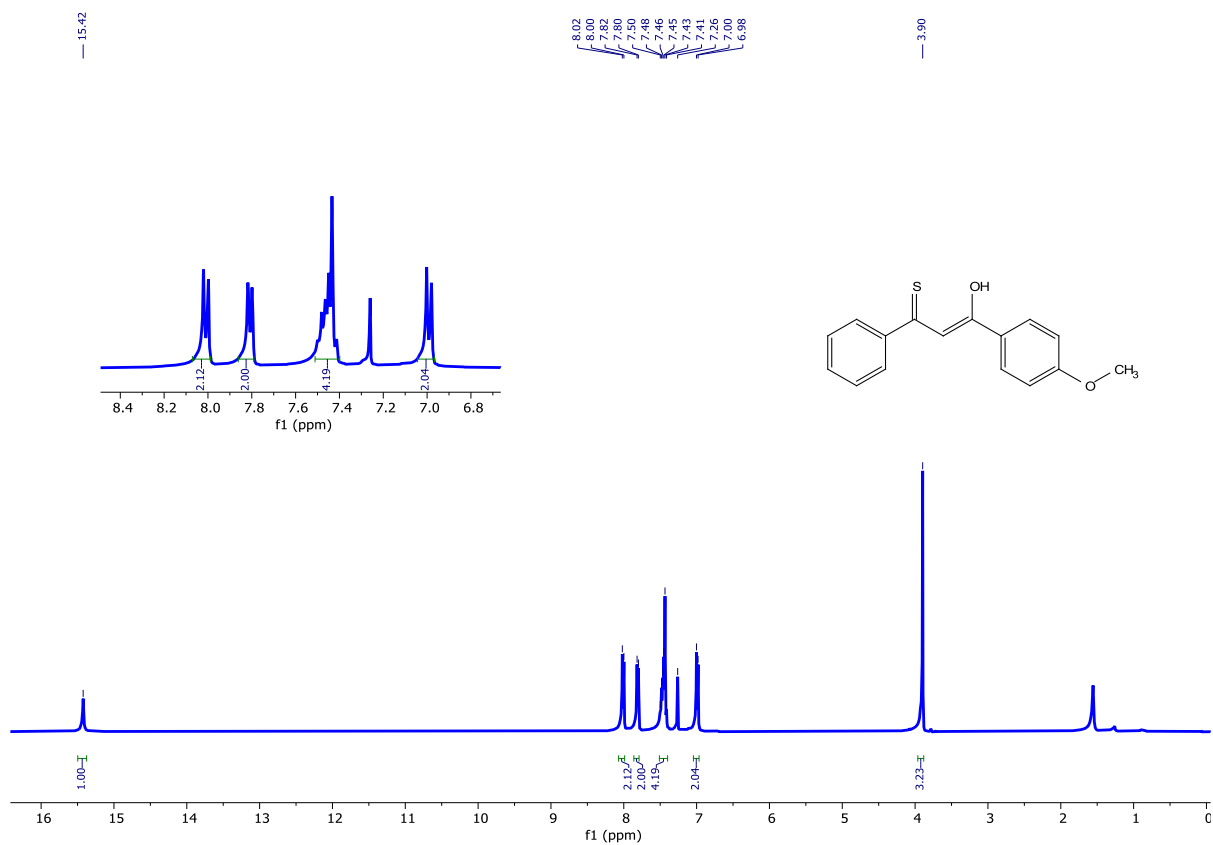

**Figure S3.** <sup>1</sup>H NMR (400 MHz) spectrum of **compound L1** in CDCl<sub>3</sub>

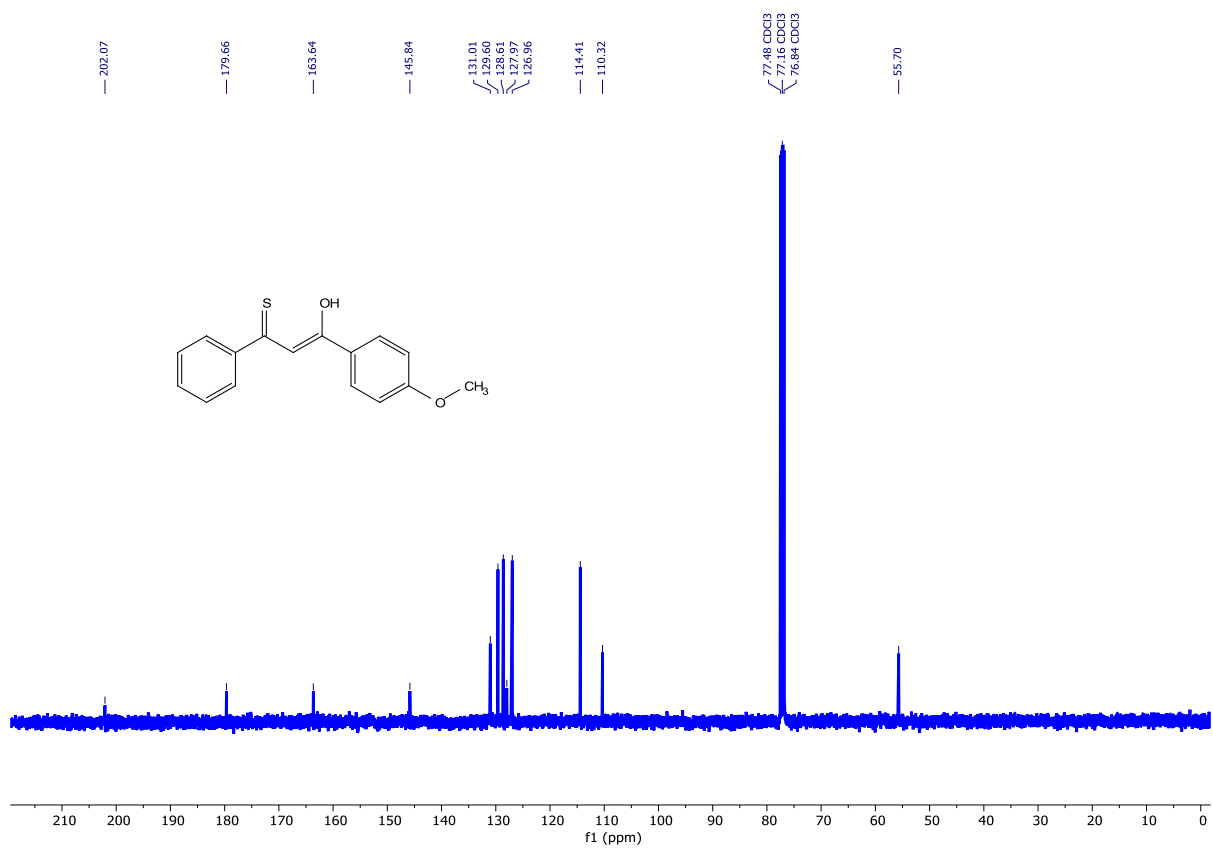

**Figure S4.** <sup>13</sup>C NMR (101 MHz) spectrum of **compound L1** in CDCl<sub>3</sub>

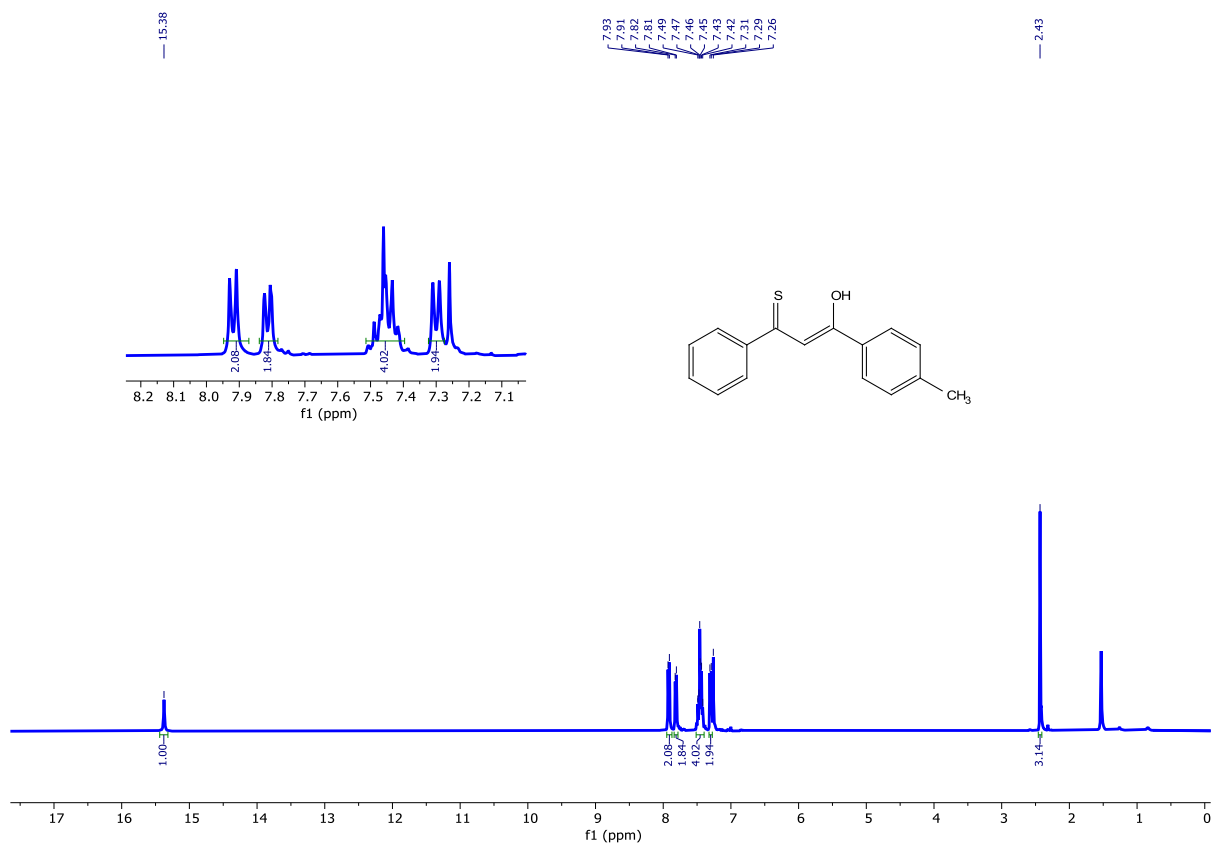

**Figure S5.** <sup>1</sup>H NMR (400 MHz) spectrum of L2 in CDCl<sub>3</sub>

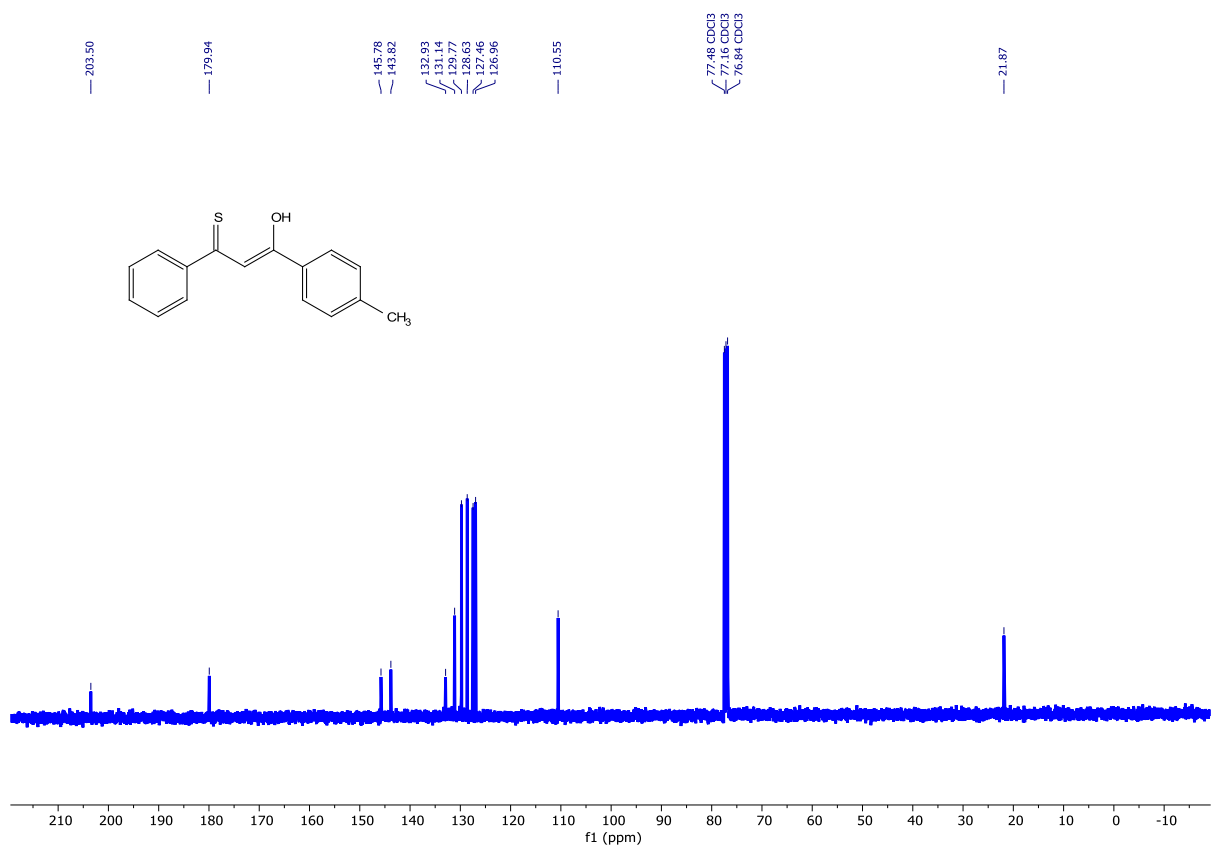

**Figure S6.** <sup>13</sup>C NMR (101 MHz) spectrum of compound L2 in CDCl<sub>3</sub>

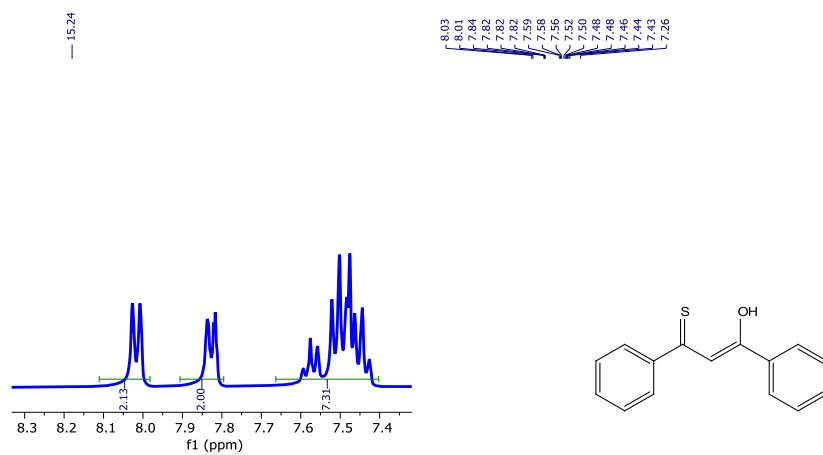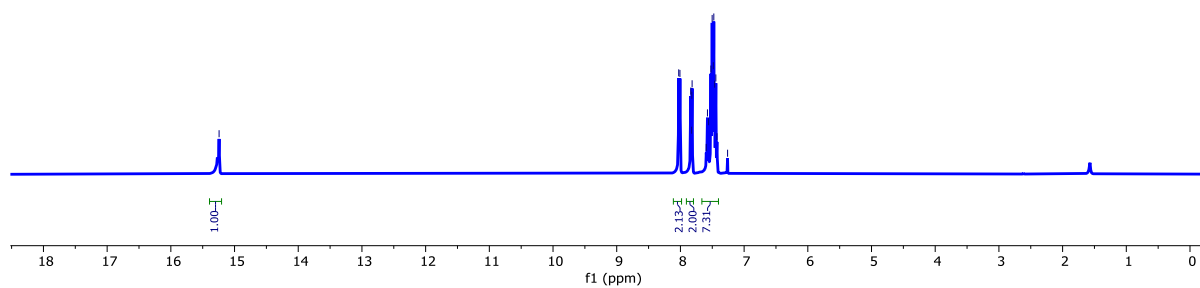

**Figure S7.**  $^1\text{H}$  NMR (400 MHz) spectrum of **compound L3** in  $\text{CDCl}_3$

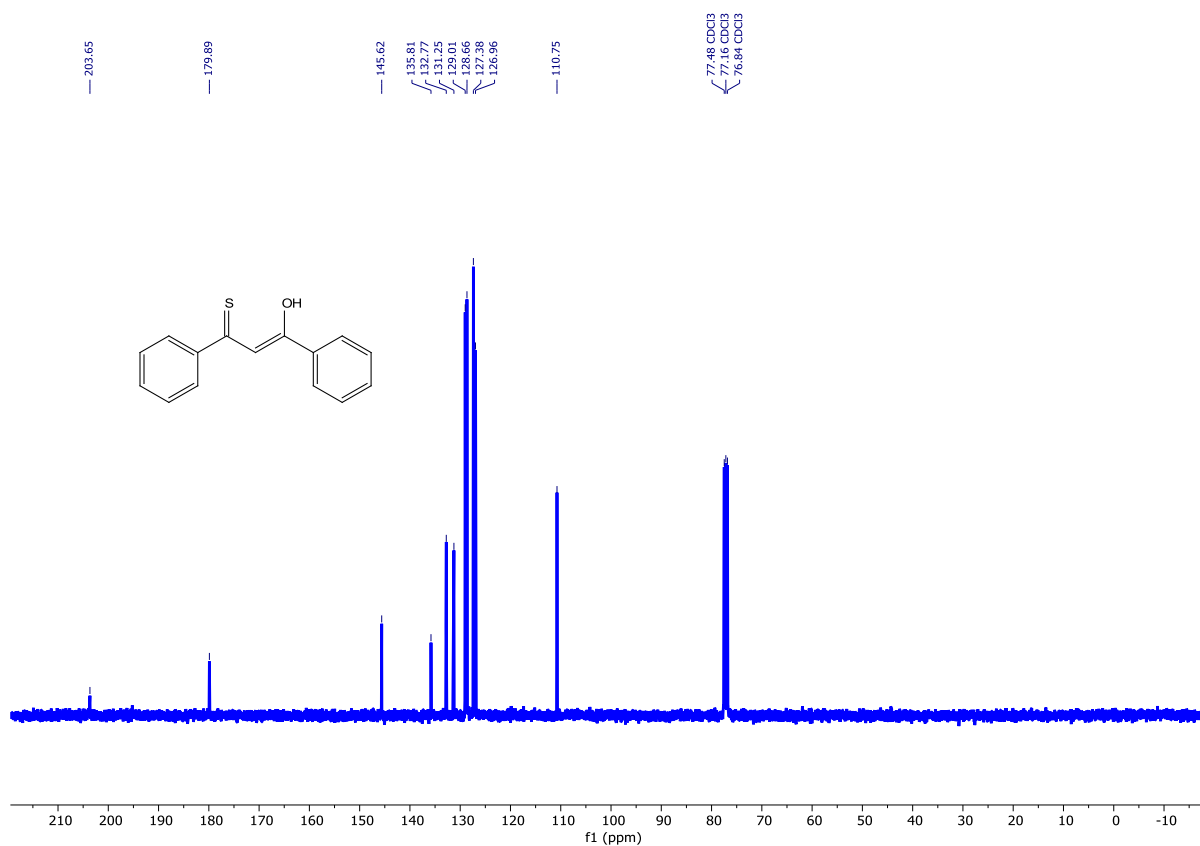

**Figure S8.**  $^{13}\text{C}$  NMR (101 MHz) spectrum of **compound L3** in  $\text{CDCl}_3$

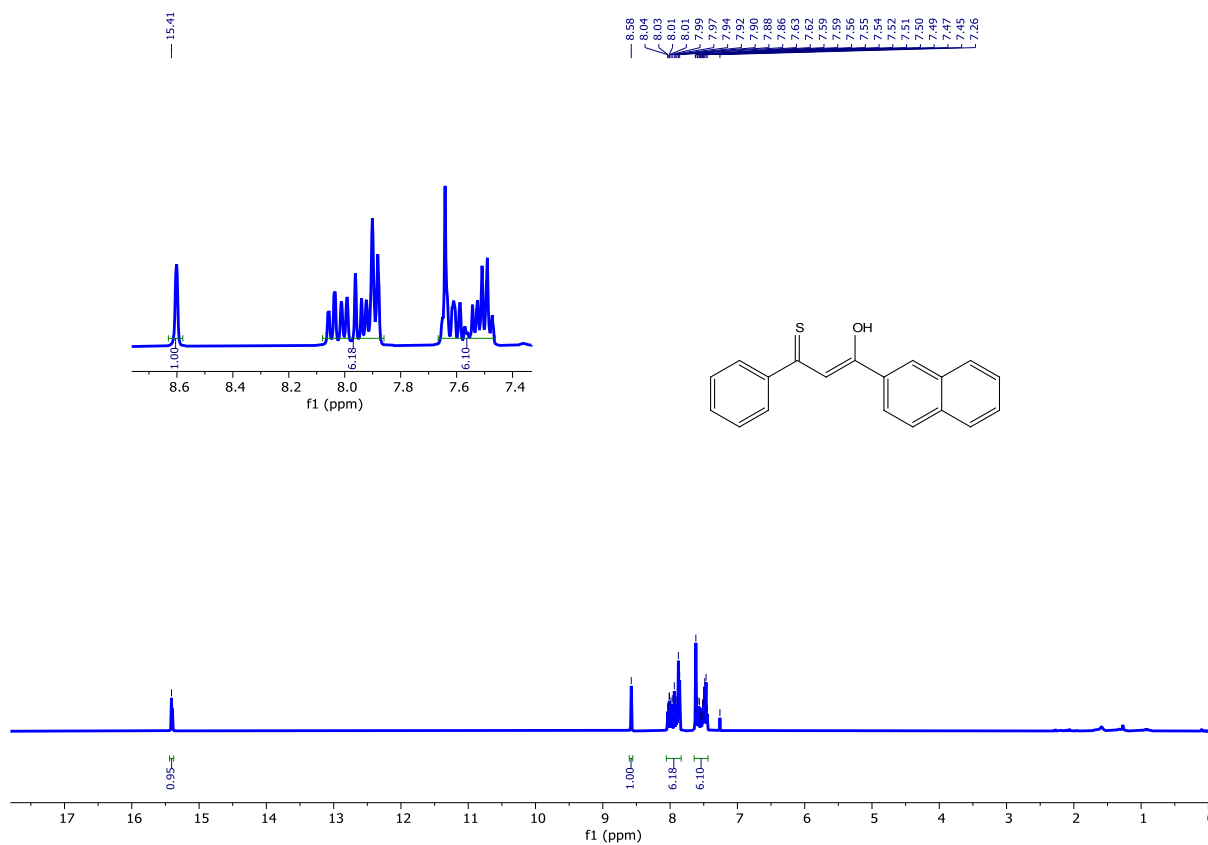

**Figure S9.** <sup>1</sup>H NMR (400 MHz) spectrum of compound L4 in CDCl<sub>3</sub>

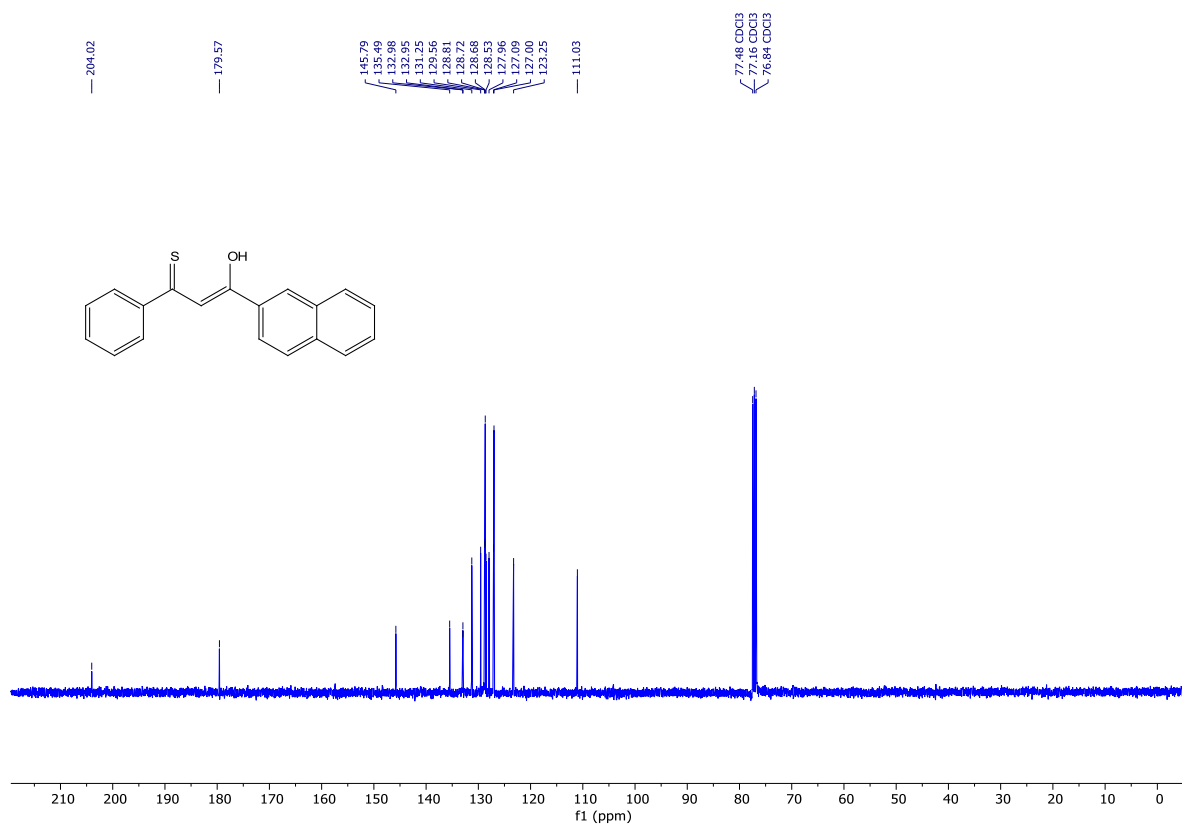

**Figure S10.** <sup>13</sup>C NMR (101 MHz) spectrum of compound L4 in CDCl<sub>3</sub>

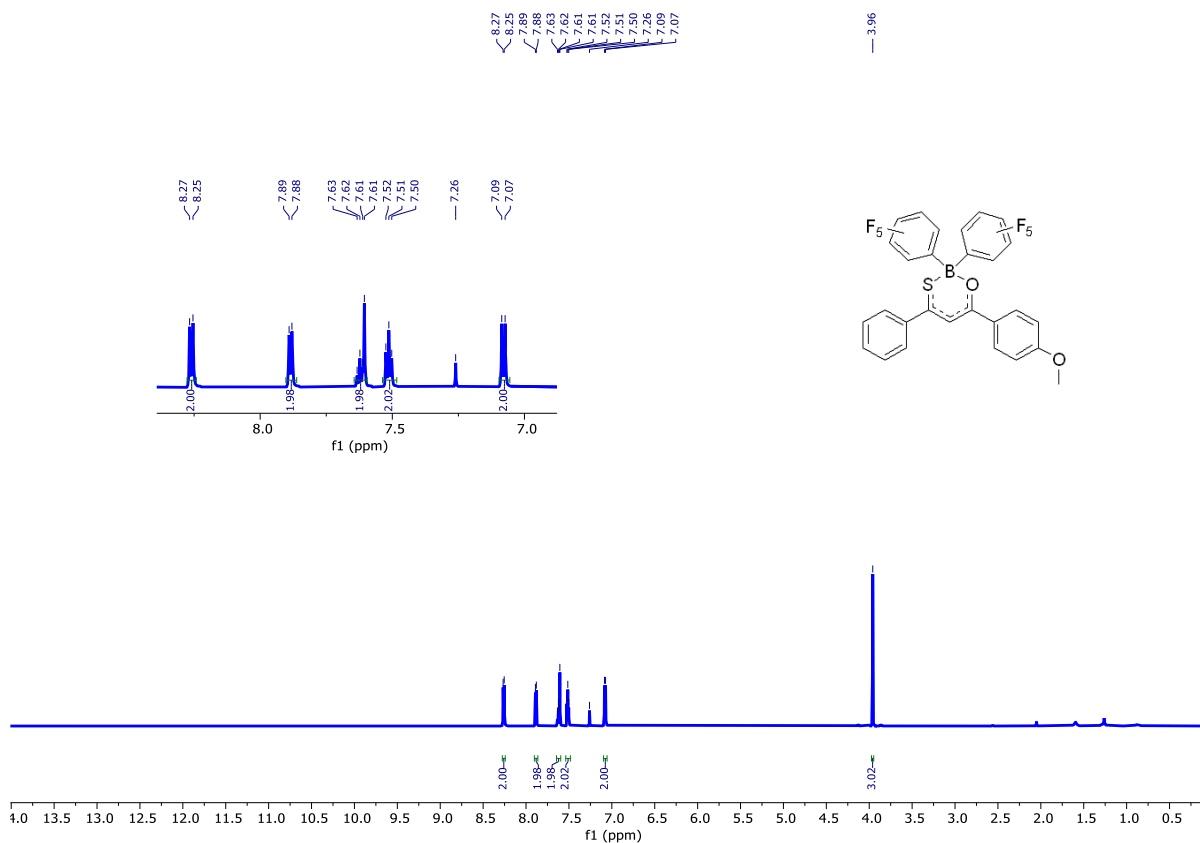

**Figure S11.**  $^1\text{H}$  NMR (400 MHz) spectrum of compound **1** in  $\text{CDCl}_3$

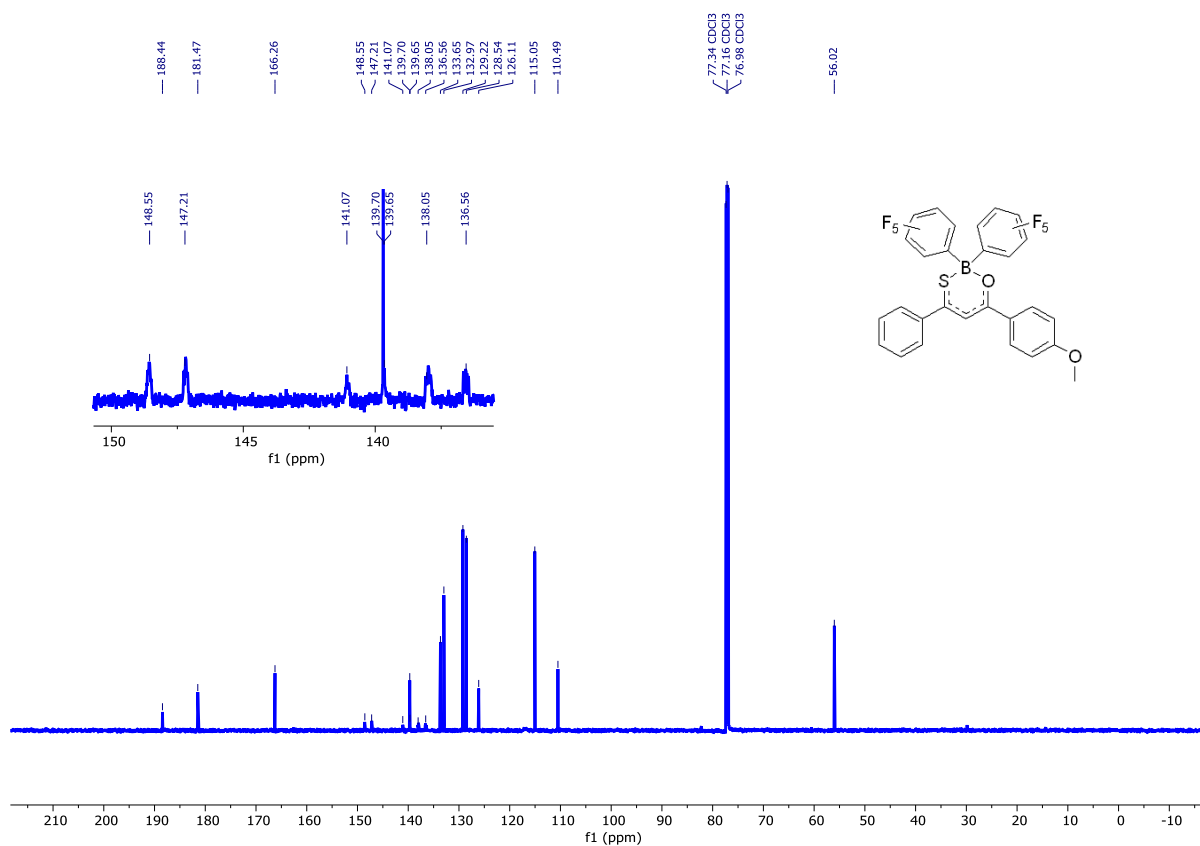



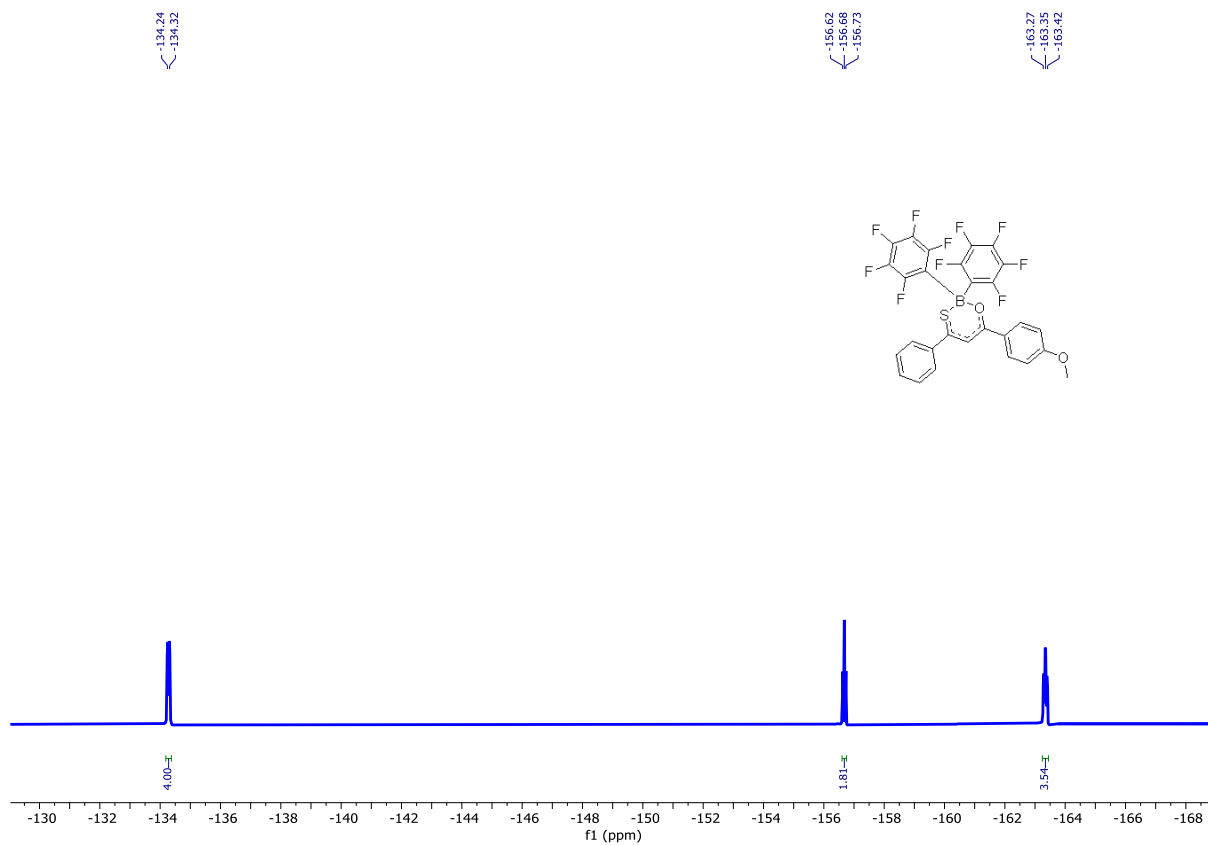

**Figure S13.**  $^{19}\text{F}$  NMR (376 MHz) spectrum of **compound 1** in  $\text{CDCl}_3$

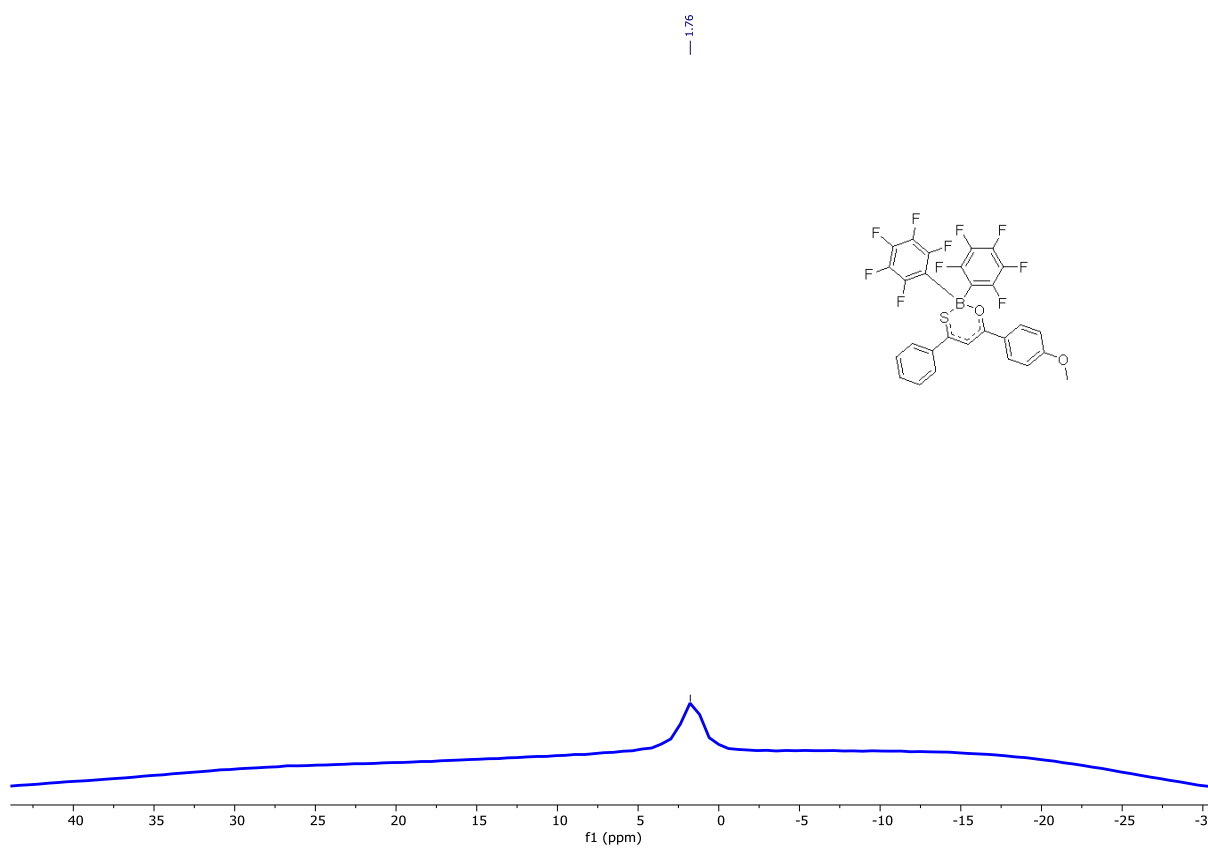

**Figure S14.**  $^{11}\text{B}$  NMR (128 MHz) spectrum of **compound 1** in  $\text{CDCl}_3$

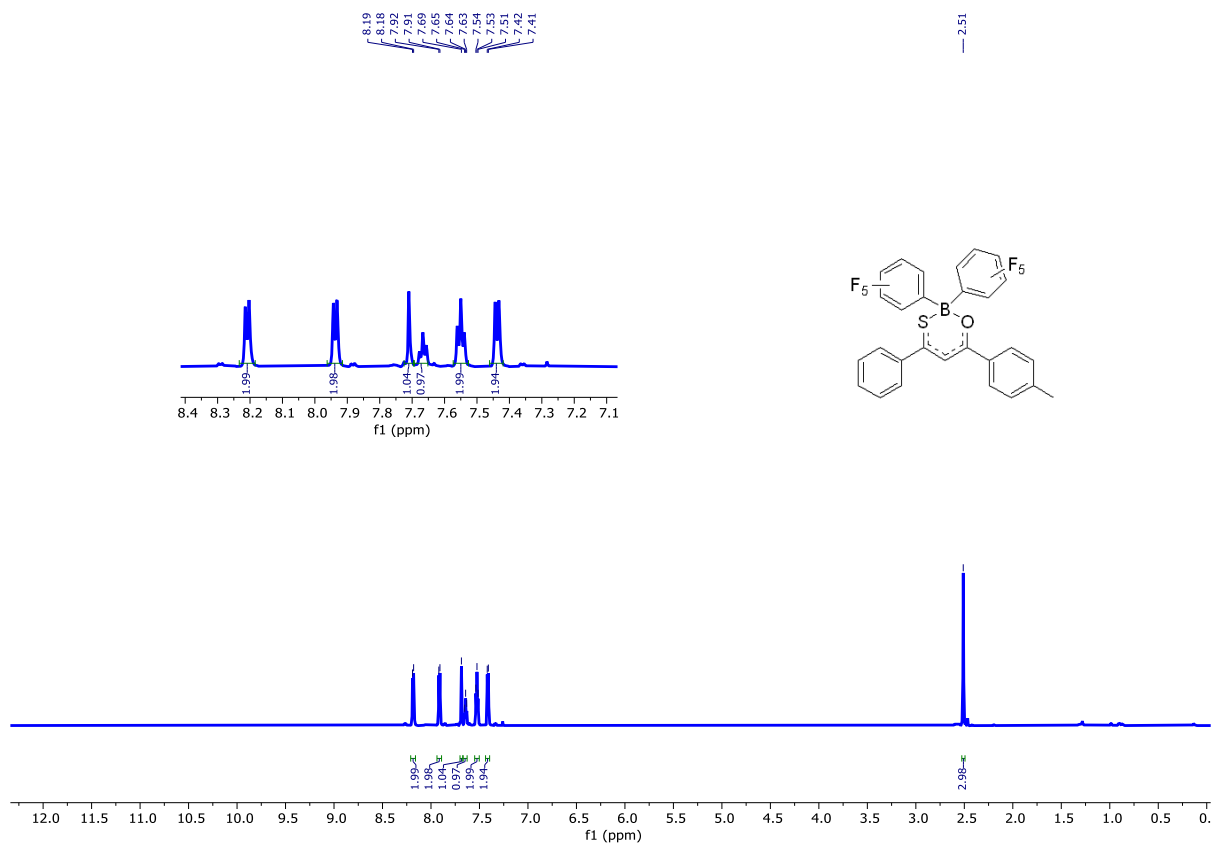

Figure S15. <sup>1</sup>H NMR (400 MHz) spectrum of compound 2 in CDCl<sub>3</sub>

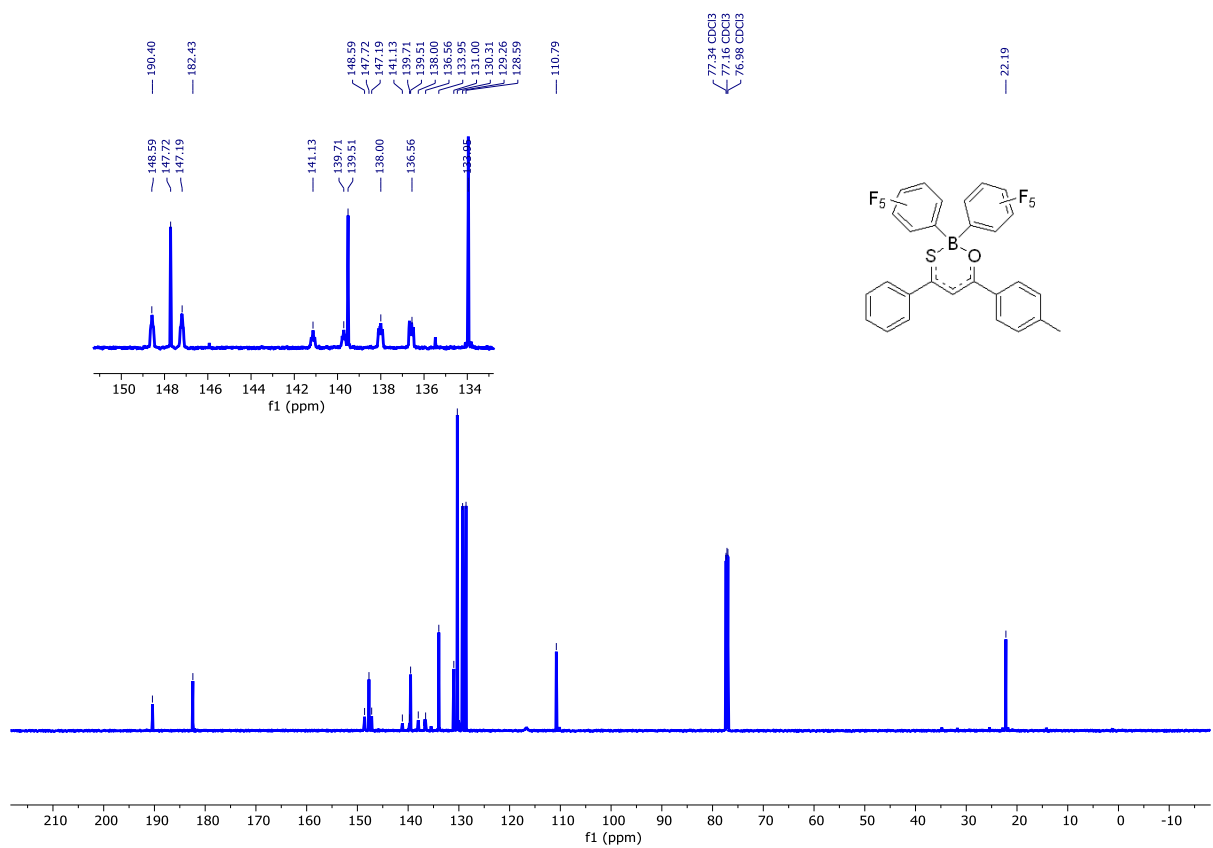

Figure S16. <sup>13</sup>C NMR (101 MHz) spectrum of compound 2 in CDCl<sub>3</sub>

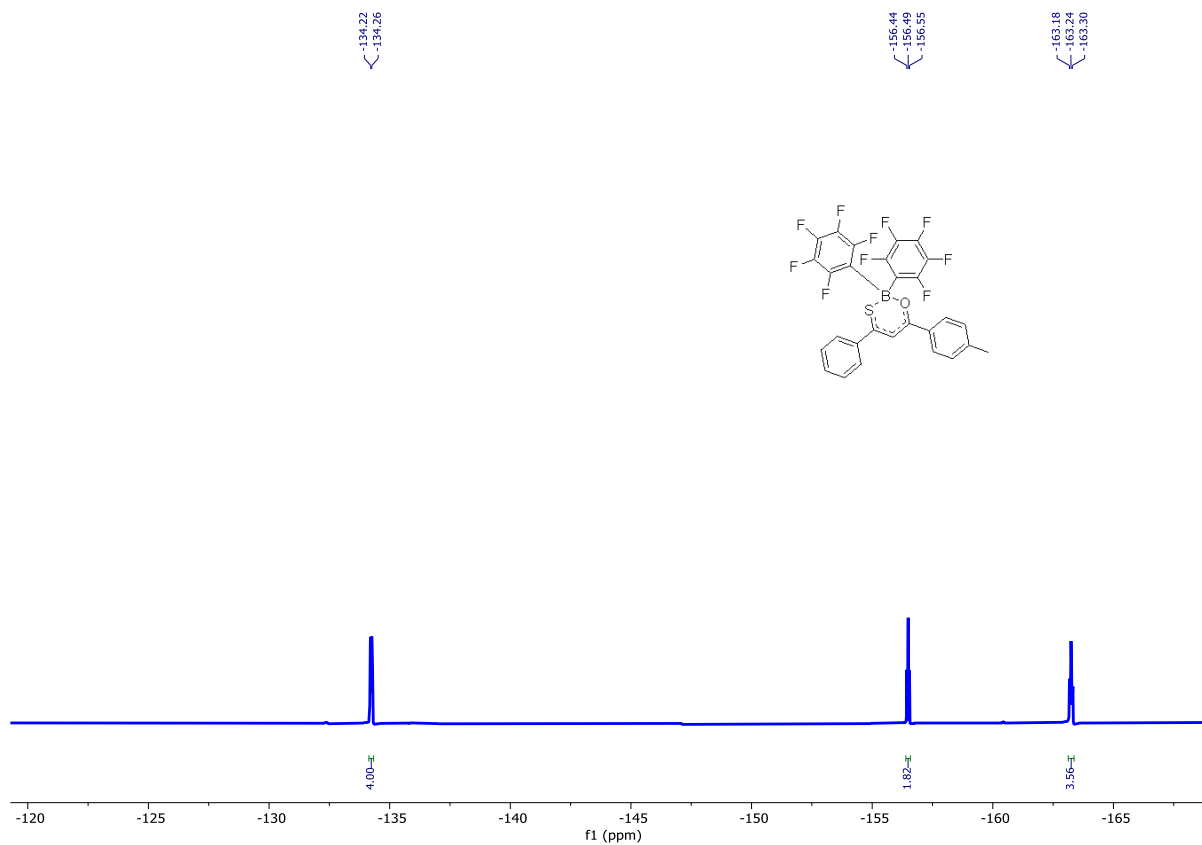

**Figure S17.**  $^{19}\text{F}$  NMR (376 MHz) spectrum of **compound 2** in  $\text{CDCl}_3$

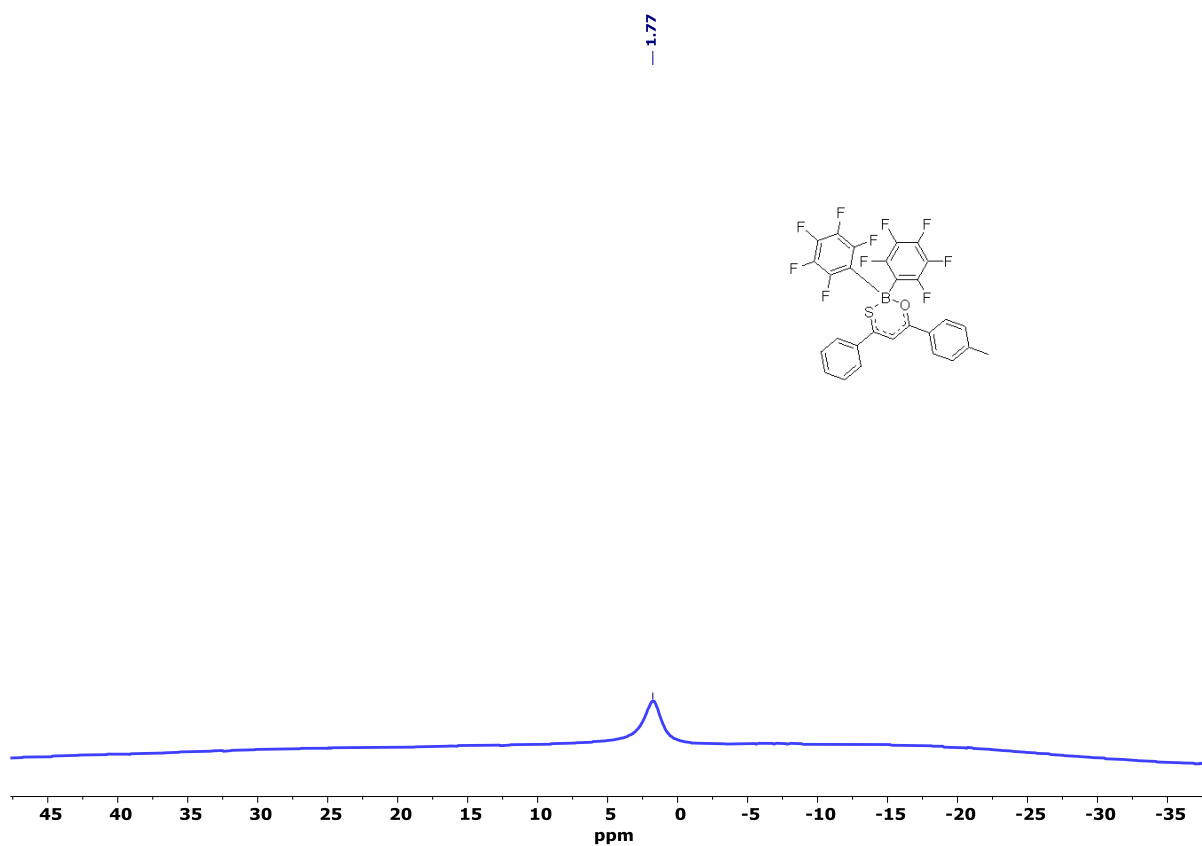

**Figure S18.**  $^{11}\text{B}$  NMR (128 MHz) spectrum of **compound 2** in  $\text{CDCl}_3$



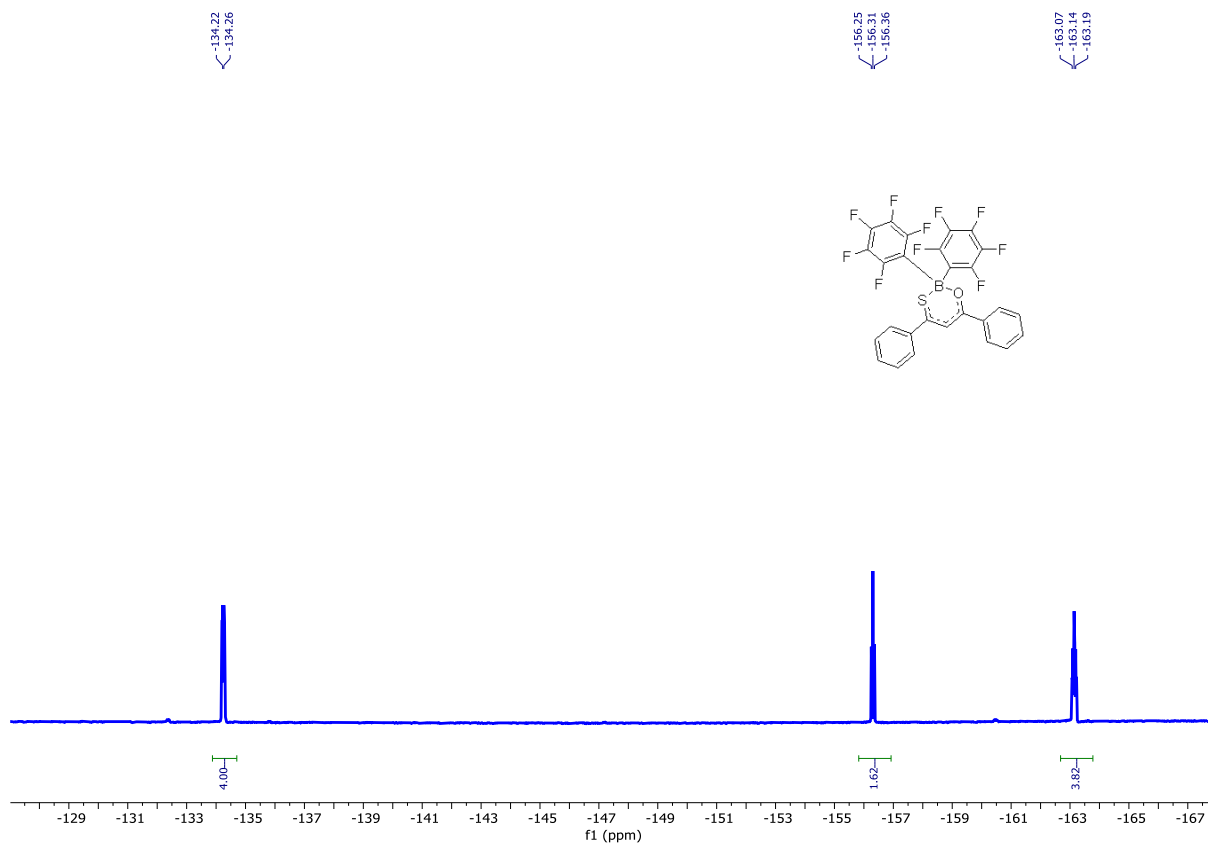

Figure S21. <sup>19</sup>F NMR (376 MHz) spectrum of compound 3 in CDCl<sub>3</sub>

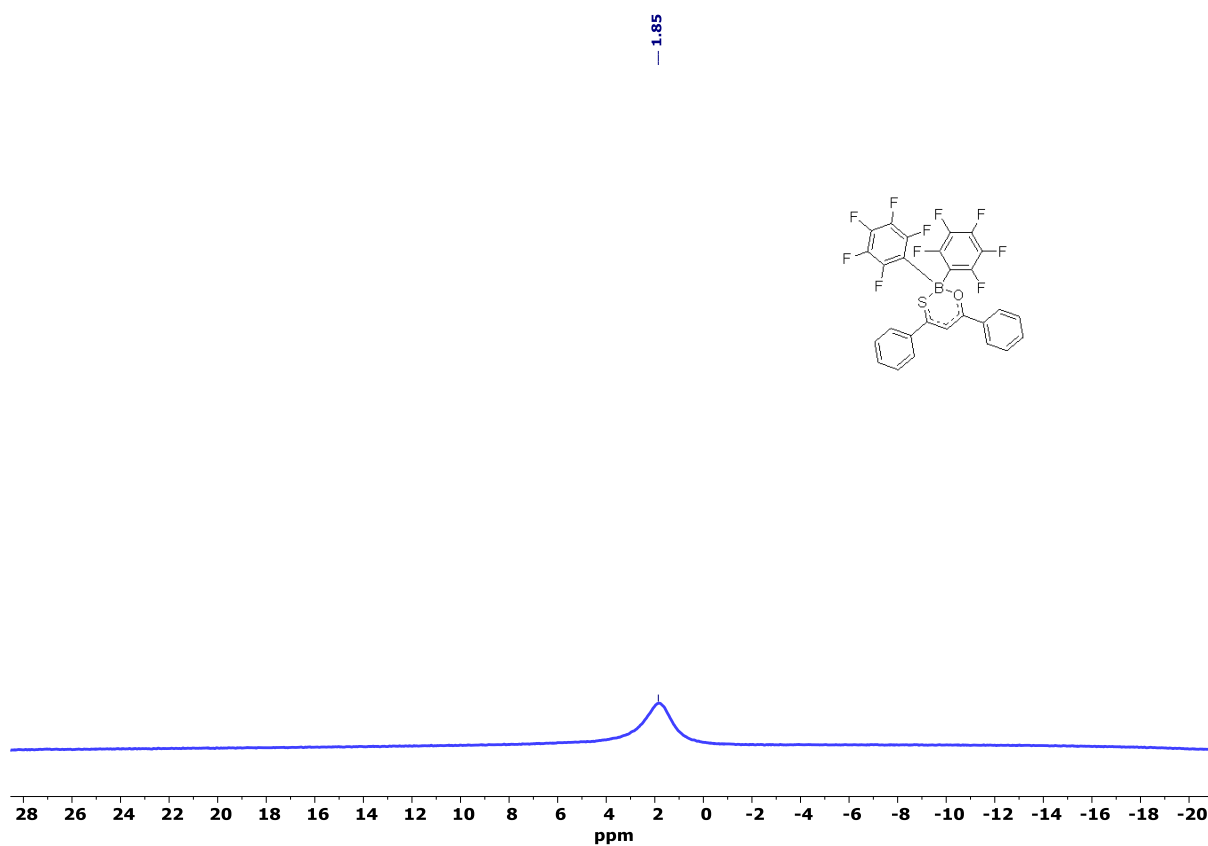

Figure S22. <sup>11</sup>B NMR (128 MHz) spectrum of compound 3 in CDCl<sub>3</sub>



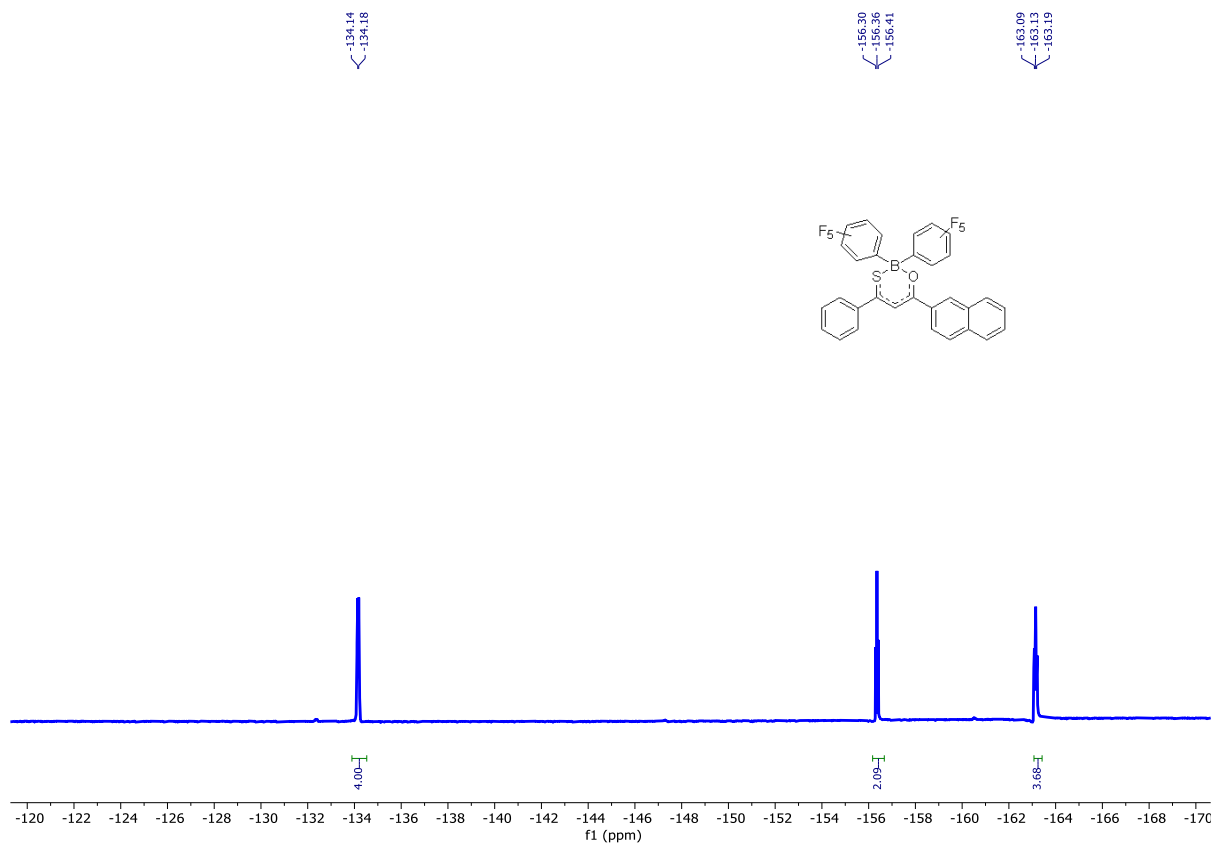

**Figure S25.**  $^{19}\text{F}$  NMR (376 MHz) spectrum of **compound 4** in  $\text{CDCl}_3$

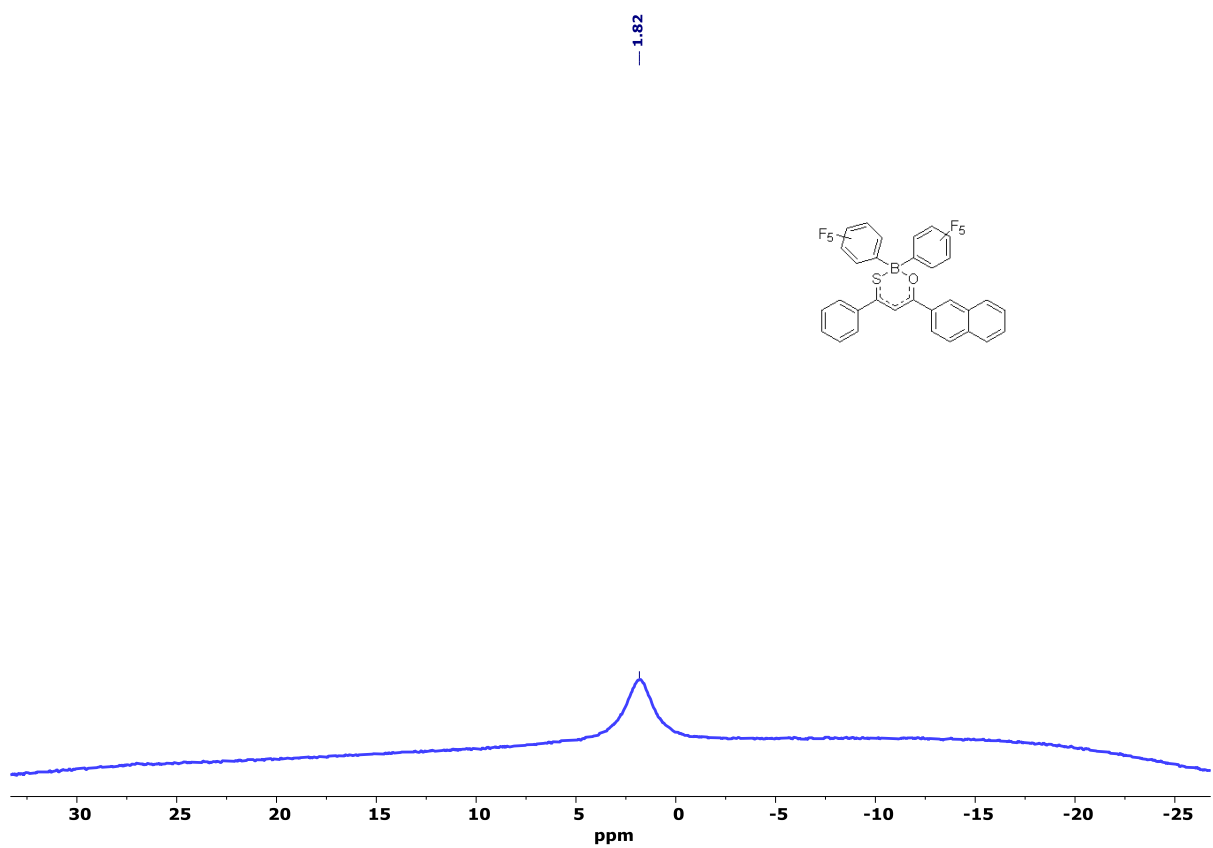

**Figure S26.**  $^{11}\text{B}$  NMR (128 MHz) spectrum of **compound 4** in  $\text{CDCl}_3$

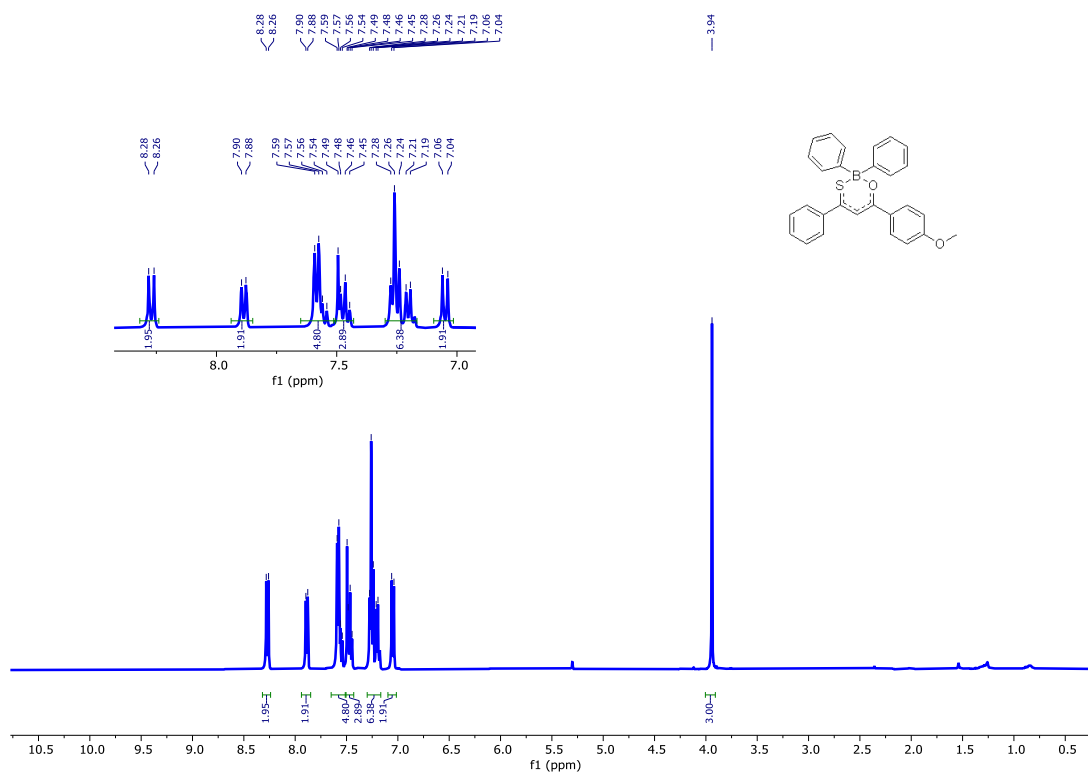

Figure S27. <sup>1</sup>H NMR (400 MHz) spectrum of compound 5 in CDCl<sub>3</sub>

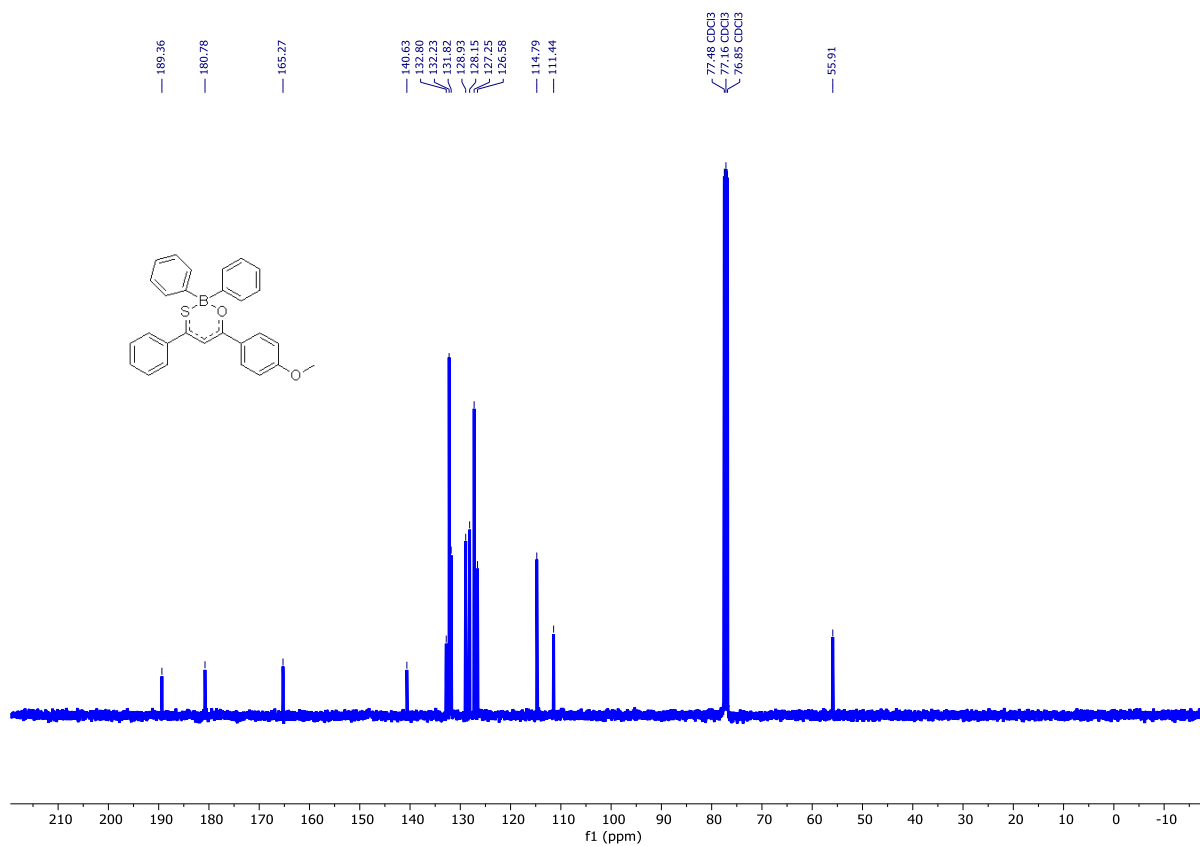

Figure S28. <sup>13</sup>C NMR (101 MHz) spectrum of compound 5 in CDCl<sub>3</sub>



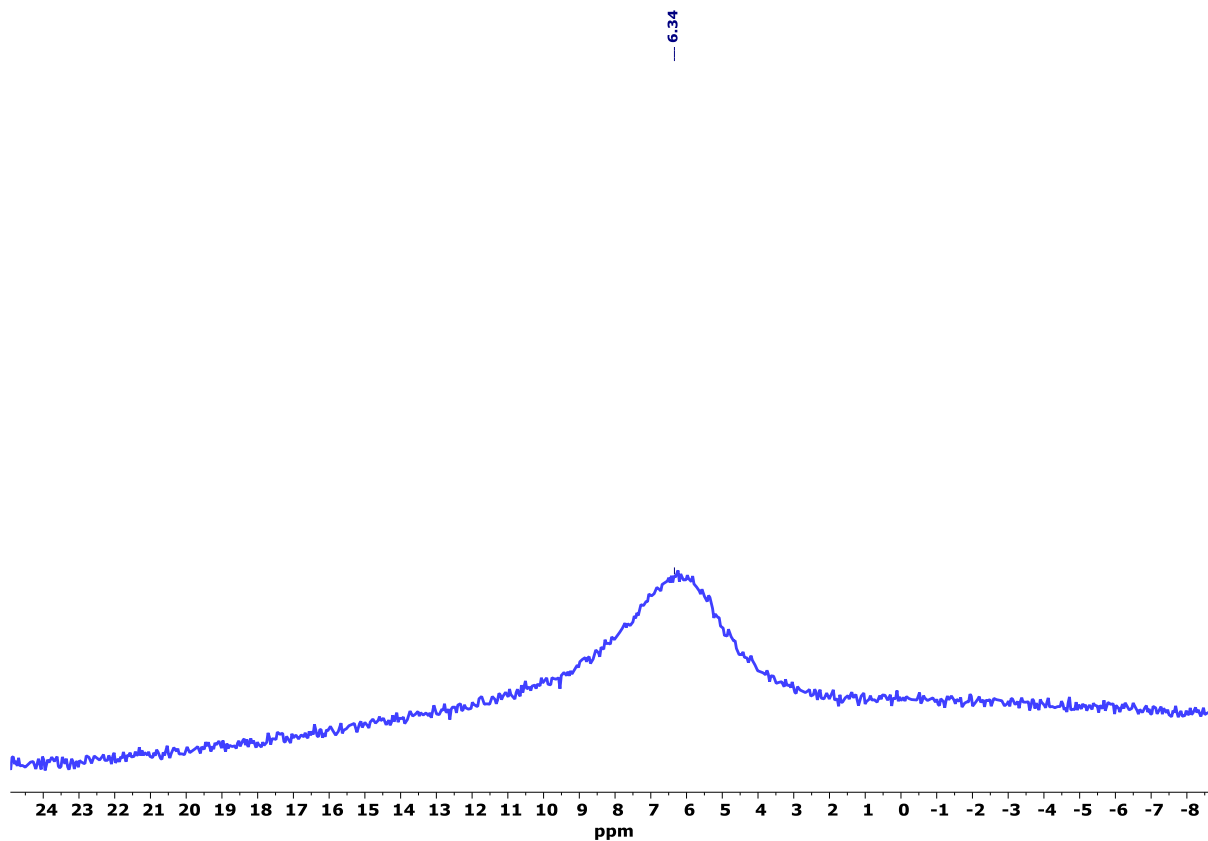

Figure S29.  $^{11}\text{B}$  NMR (128 MHz) spectrum of compound 5 in  $\text{CDCl}_3$

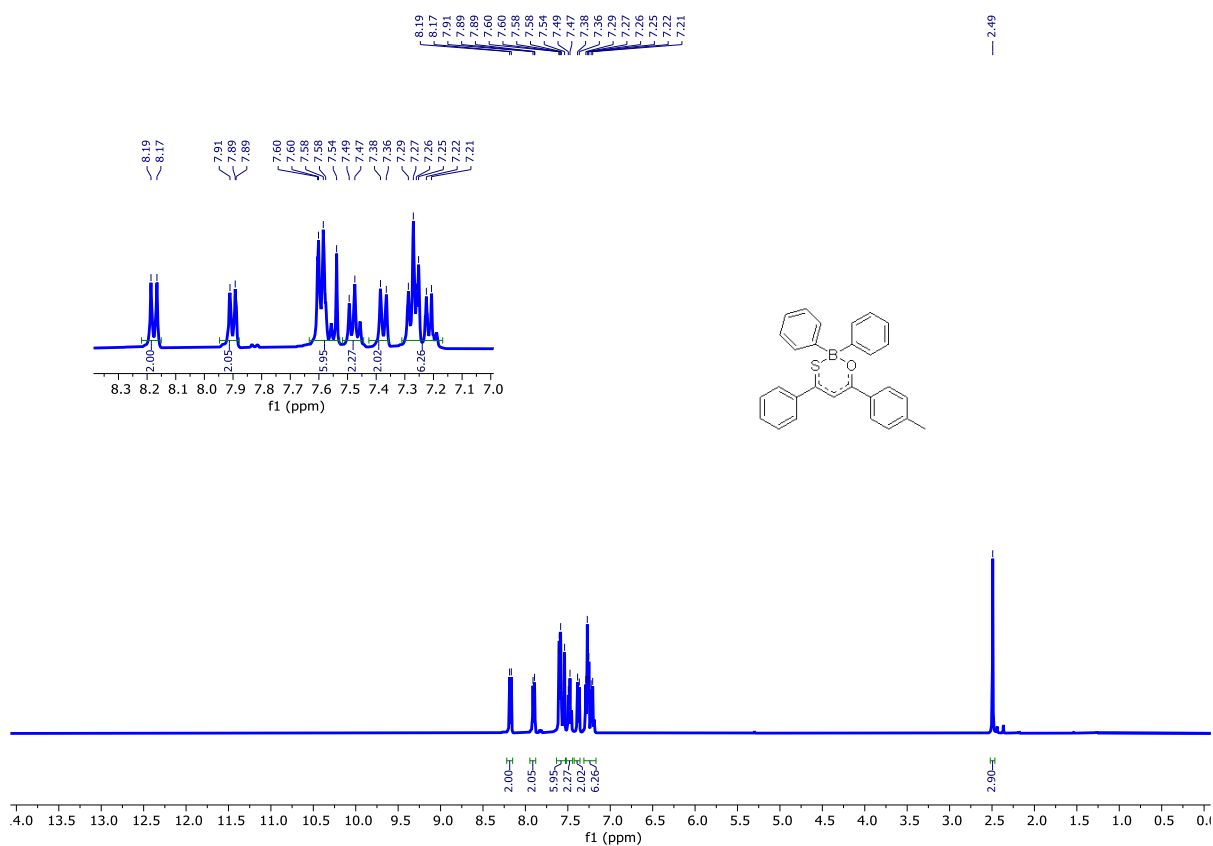

Figure S30.  $^1\text{H}$  NMR (400 MHz) spectrum of compound 6 in  $\text{CDCl}_3$

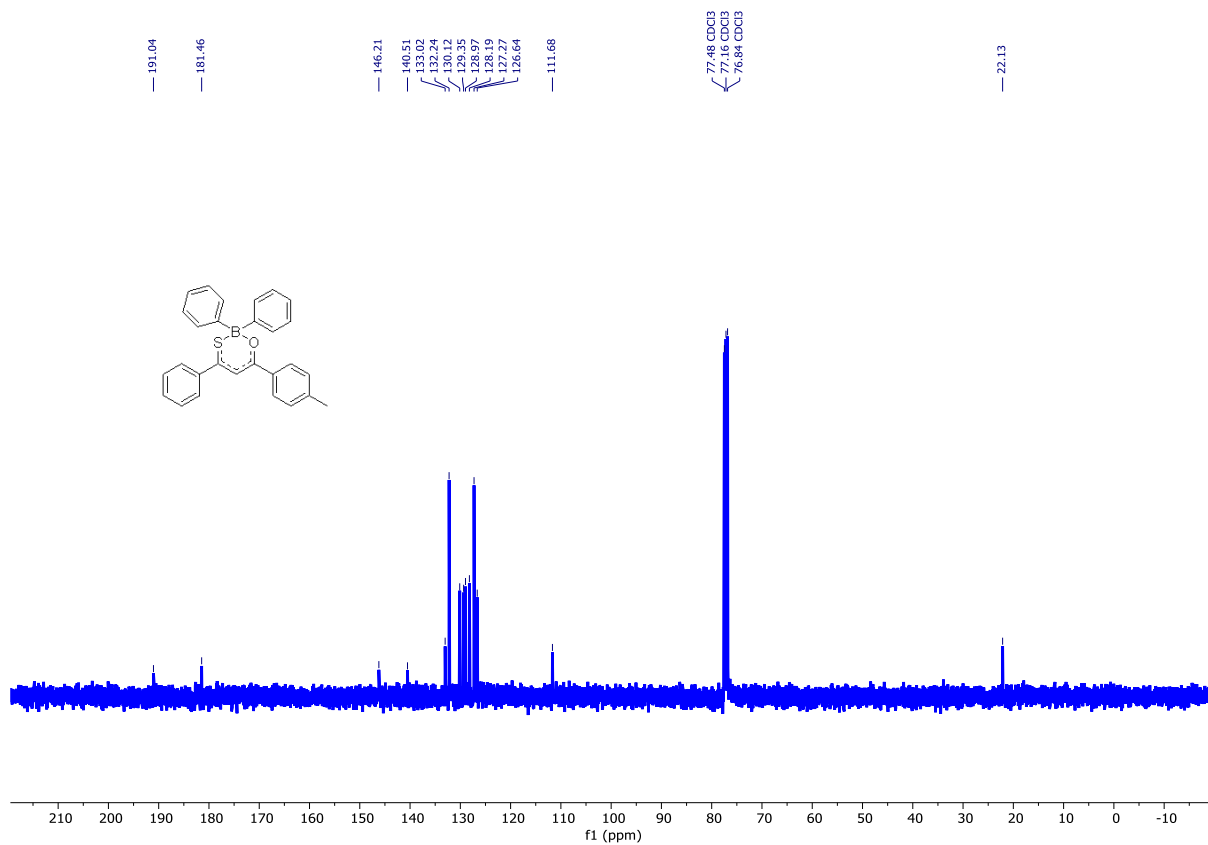

**Figure S31.** <sup>13</sup>C NMR (101 MHz) spectrum of **compound 6** in CDCl<sub>3</sub>

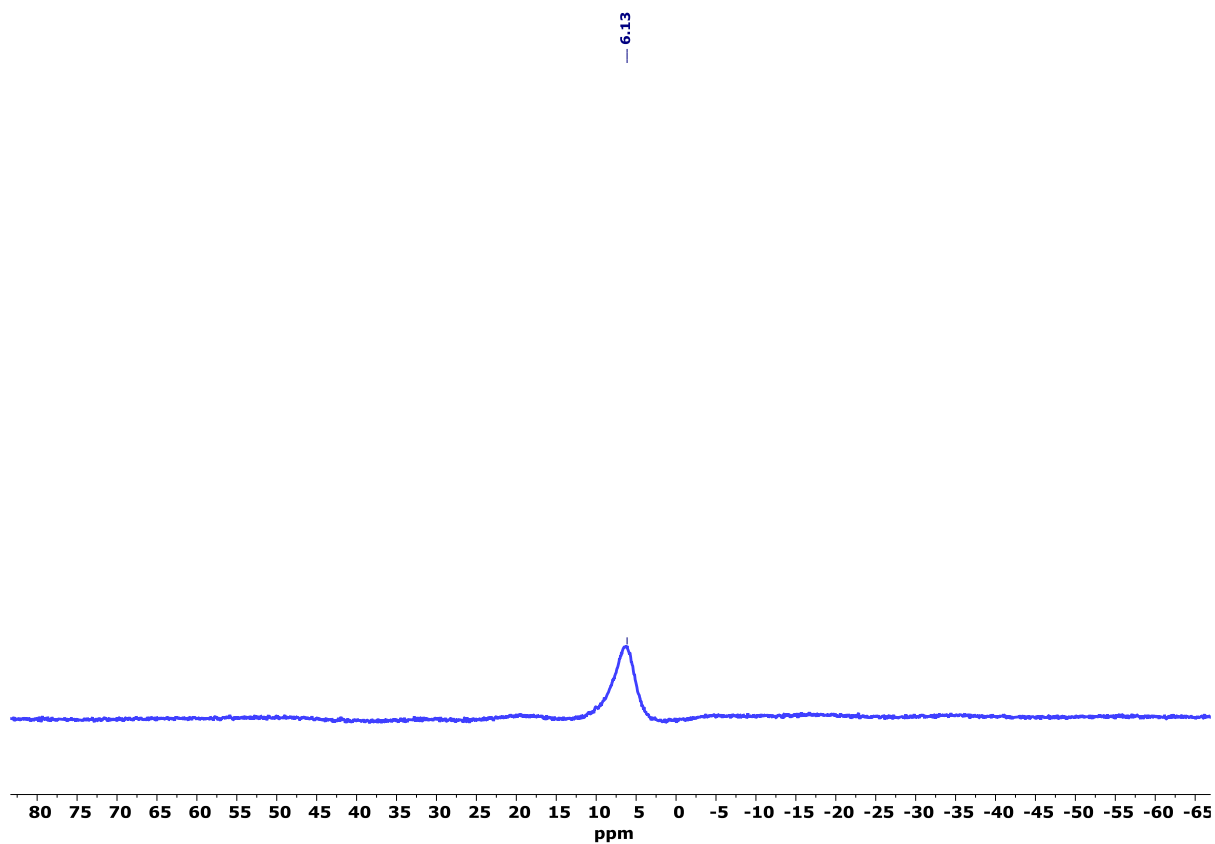

**Figure S32.** <sup>11</sup>B NMR (128 MHz) spectrum of **compound 6** in CDCl<sub>3</sub>



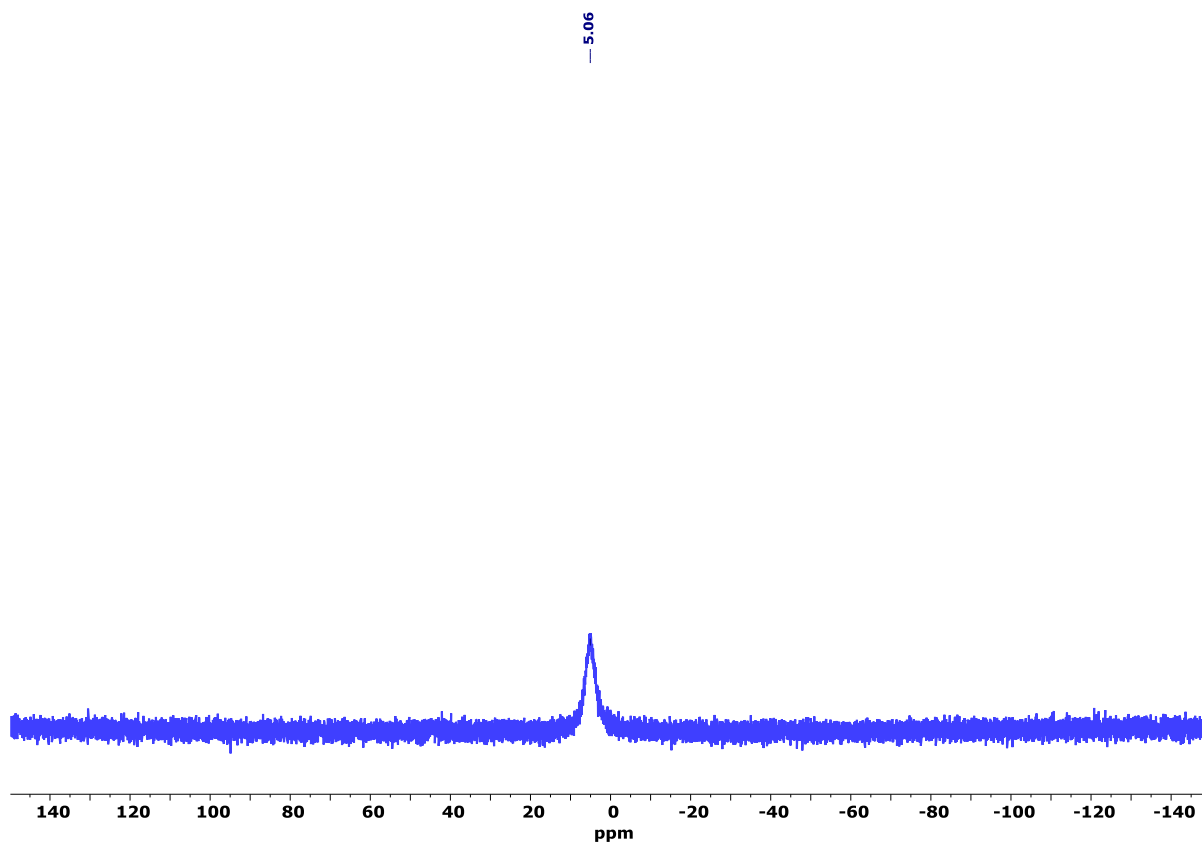

Figure S35.  $^{11}\text{B}$  NMR (128 MHz) spectrum of compound **7** in  $\text{CDCl}_3$

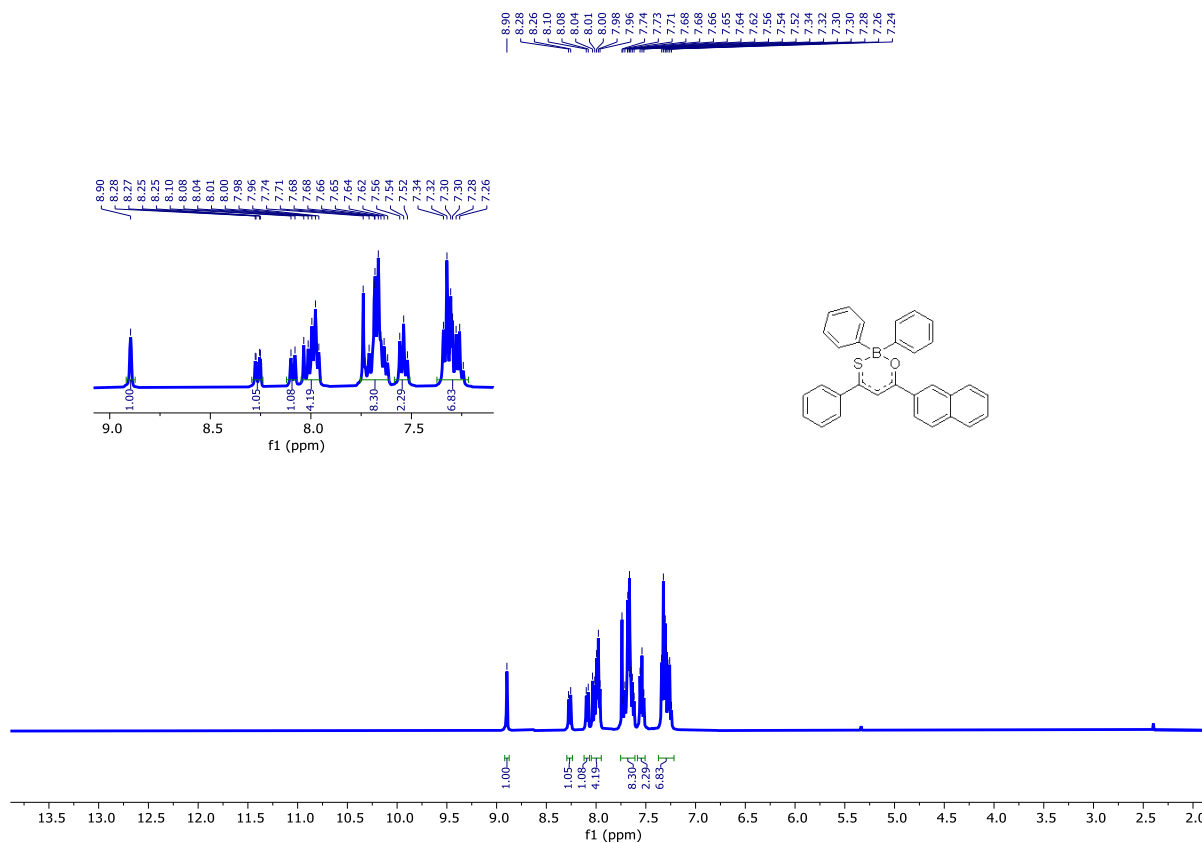

Figure S36.  $^1\text{H}$  NMR (400 MHz) spectrum of compound **8** in  $\text{CDCl}_3$

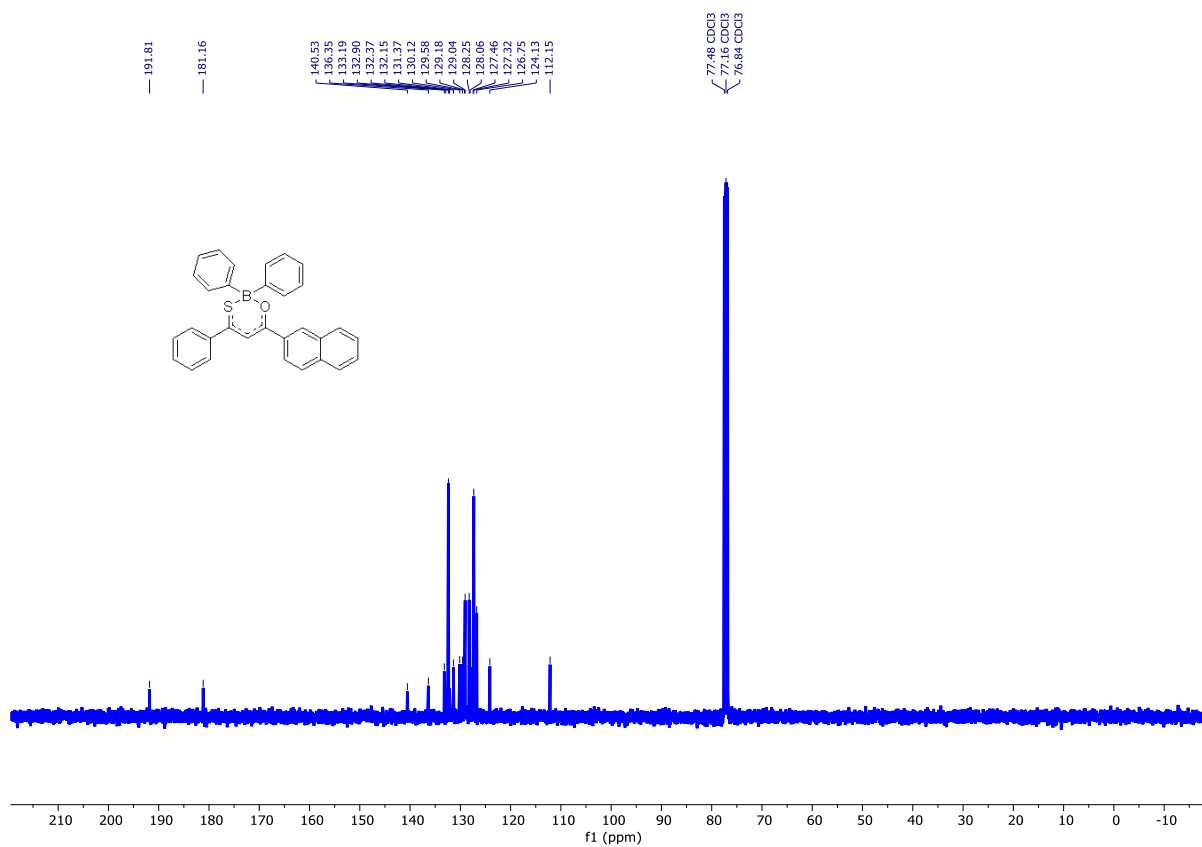

Figure S37. <sup>13</sup>C NMR (101 MHz) spectrum of compound 8 in CDCl<sub>3</sub>

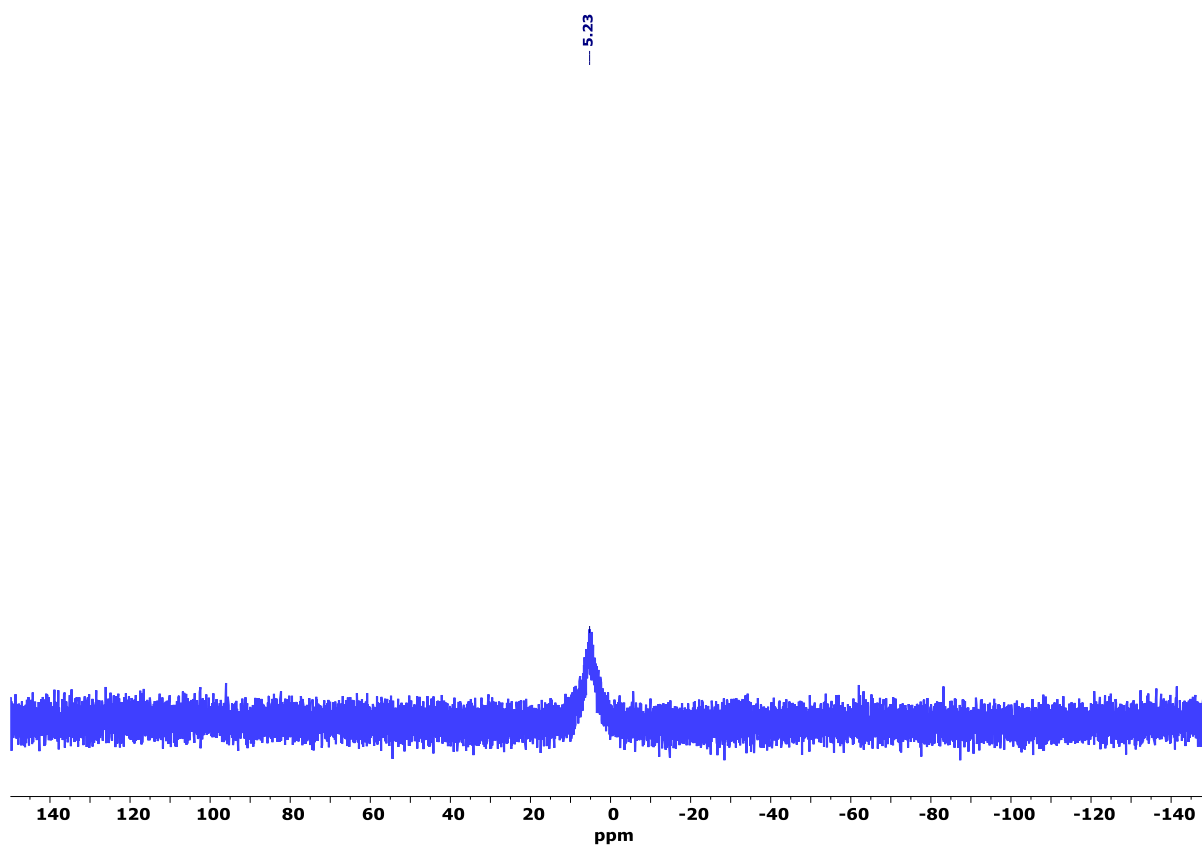

Figure S38. <sup>11</sup>B NMR (128 MHz) spectrum of 8 in CDCl<sub>3</sub>

Optimized x,y,z coordinates for compounds **1- 8** calculated on Gaussian 03 at the B3LYP//6-31g(d) level

Compound **1**

S 0.60917200S 1.85688800 -1.29591400  
F 0.73723100 -2.56331200 -1.84964700  
F 3.44067800 1.03966000 -0.30552600  
O -0.55972700 -0.57885600 -0.67836400  
F 0.62701700 -2.16195600 1.30646600  
F 2.90375200 -3.75549200 -2.81688300  
F 5.37007900 -2.60637600 -2.56547100  
F 1.23429400 2.56411900 1.51922500  
F 5.61460800 -0.19160500 -1.29344300  
F 0.88345700 -2.29246300 3.96571800  
F 1.32461600 -0.01757200 5.42632400  
F 1.49656600 2.39281300 4.14774700  
C 0.89114600 0.20557600 1.26126600  
C -1.43051300 3.67302200 -1.14595600  
C -1.74683200 -0.06006100 -0.50892500  
C -1.95944100 1.33515500 -0.48759500  
H -2.94430200 1.69328100 -0.22143100  
C -1.02782100 2.26968600 -0.92172700  
C -2.82993700 -1.03046900 -0.39708200  
C -2.71580800 3.98027500 -1.63477000  
H -3.40364100 3.17939000 -1.88412700  
C 1.90966300 -1.91912700 -1.68369700  
C 1.97899900 -0.68445400 -1.03321200  
C 3.03061000 -2.56956100 -2.19952800  
C 0.82401400 -0.99948900 1.97131700  
C 4.28739200 -1.99108500 -2.07207000  
C 3.26622000 -0.15128300 -0.92499500  
C -3.09382100 5.30365000 -1.84375700  
H -4.08183300 5.52470000 -2.23495100  
C 1.13017400 1.32954800 2.05491300  
C -0.53916500 4.72790800 -0.87138300  
H 0.44154200 4.50364900 -0.46695500  
C 4.40831600 -0.76494500 -1.42697100  
C -4.18747700 -0.66330000 -0.48467000  
H -4.46900000 0.36787400 -0.66294600  
C -5.19975900 -1.60641900 -0.37460800  
H -6.23163200 -1.28915800 -0.45265400  
C -2.20214400 6.34224400 -1.56091500  
H -2.50064200 7.37361700 -1.72133000  
C -2.51774600 -2.39784300 -0.20414600  
H -1.47848700 -2.69333400 -0.13255800

C 0.96097600 -1.10138800 3.35132200  
C -4.87032300 -2.95885300 -0.17562900  
C -0.92648900 6.05055800 -1.07225000  
H -0.23418500 6.85392800 -0.84120500  
C 1.18874800 0.05084700 4.09580800  
B 0.72809800 0.11950700 -0.37210300  
C 1.27514800 1.27241400 3.44127500  
C -3.51701300 -3.34349600 -0.09308900  
H -3.28415700 -4.39114700 0.06379200  
O -5.77046400 -3.95556500 -0.05459500  
C -7.16704800 -3.64349300 -0.12312200  
H -7.68673900 -4.59239900 0.00386500  
H -7.45696400 -2.95645200 0.67810500  
H -7.42678300 -3.21036400 -1.09422100

## Compound 2

S 0.41801700 -1.79775700 -1.24887700  
  
F -1.68573500 2.08321700 -1.88890300  
F -2.47415500 -2.32036400 -0.26038900  
O 0.36758000 0.91965500 -0.69884400  
F -1.42094600 1.84282500 1.26147800  
F -4.15538700 2.14969200 -2.86450600  
F -5.83703800 0.01573000 -2.57537900  
F 0.19178400 -2.63383700 1.58592200  
F -4.96807100 -2.22350000 -1.25671100  
F -1.70954500 1.90832000 3.92010900  
F -1.06522200 -0.28040000 5.43577200  
F -0.12000800 -2.53558500 4.21320900  
C -0.57787900 -0.38549300 1.27246400  
C 3.05574400 -2.49576700 -1.10666700  
C 1.66081600 0.98968400 -0.53933700  
C 2.47895100 -0.15496700 -0.49388500  
H 3.52108000 -0.02133500 -0.23878000  
C 2.06526300 -1.42172700 -0.89654000  
C 2.19745500 2.35184600 -0.45910400  
C 4.34098000 -2.19874800 -1.60252500  
H 4.59434800 -1.17806800 -1.86777500  
C -2.44160200 0.98297800 -1.70439100  
C -1.94763900 -0.13718900 -1.03088900  
C -3.73428300 1.04675700 -2.22448500  
C -1.06755700 0.73506900 1.95459300  
C -4.59451400 -0.03442500 -2.07779600  
C -2.85547400 -1.19186500 -0.90352500  
C 5.27319300 -3.21341800 -1.79920600  
H 6.25406600 -2.97215100 -2.19622400  
C -0.27827800 -1.47479200 2.09342800

C 2.73483600 -3.83500400 -0.81166500  
H 1.75955700 -4.07037000 -0.40049500  
C -4.15038900 -1.17012900 -1.40907100  
C 3.56996800 2.63035100 -0.61413400  
H 4.27437300 1.83503800 -0.82917800  
C 4.03689800 3.93544600 -0.52931400  
H 5.09694200 4.13100500 -0.66137100  
C 4.94457100 -4.53792400 -1.49642800  
H 5.67492600 -5.32686000 -1.64694800  
C 1.31368900 3.42609800 -0.22961100  
H 0.25701100 3.22143700 -0.10919600  
C -1.23591600 0.79786000 3.33338000  
C 3.16185300 5.00722500 -0.28819400  
C 3.67532300 -4.84454200 -1.00017900  
H 3.41936300 -5.86999100 -0.75338000  
C -0.91322400 -0.31264500 4.10580000  
B -0.47074300 -0.27556500 -0.36322700  
C -0.43334300 -1.45541800 3.47971100  
C 1.79329100 4.72629900 -0.14531700  
H 1.09797700 5.54067700 0.03719100  
C 3.68066500 6.41607900 -0.16389000  
H 4.58665900 6.56235500 -0.75802700  
H 3.93489600 6.64117600 0.87937200  
H 2.93212100 7.14706400 -0.48102400

### Compound 3

S 0.90865400 -1.49689800 -1.16904000  
F -2.07324300 1.71232100 -1.98884000  
F -1.77030900 -2.66463600 -0.14272800  
O 0.19087700 1.15052000 -0.74612300  
F -1.81182400 1.67809700 1.16848900  
F -4.47396100 1.12107200 -2.96221300  
F -5.58252400 -1.34384200 -2.56145200  
F 0.90550100 -2.20399200 1.70824500  
F -4.20281700 -3.23303900 -1.13476200  
F -2.13248800 1.79585400 3.82205000  
F -0.95595200 -0.07362200 5.44159900  
F 0.55443300 -2.06202900 4.32896200  
C -0.42116700 -0.25271500 1.28702700  
C 3.63572100 -1.51654700 -1.03558900  
C 1.42751600 1.53940000 -0.60412900  
C 2.50132600 0.63662800 -0.51768300  
H 3.47844800 1.03491800 -0.28188600  
C 2.41174500 -0.71211600 -0.85765000  
C 1.61412500 2.99816600 -0.58721400  
C 4.80615300 -0.93411700 -1.56204500



H 4.79903800 0.10446900 -1.87441500  
C -2.53783200 0.47063000 -1.74886600  
C -1.79070000 -0.45922700 -1.02126900  
C -3.80108100 0.18859200 -2.26863400  
C -1.19056200 0.73455200 1.91469500  
C -4.37068800 -1.06236200 -2.06540200  
C -2.41211500 -1.69748600 -0.83942300  
C 5.95890200 -1.69571400 -1.72957500  
H 6.84842400 -1.23831300 -2.15076800  
C 0.14484000 -1.18445800 2.15978200  
C 3.65608100 -2.87920800 -0.67962800  
H 2.77062500 -3.32904000 -0.24458300  
C -3.66766200 -2.01978700 -1.34191500  
C 2.87211100 3.59135800 -0.81063700  
H 3.73880200 2.97933000 -1.03205800  
C 3.00897400 4.97555400 -0.78285300  
H 3.98083400 5.42335900 -0.96268900  
C 5.96824300 -3.04550800 -1.36622100  
H 6.87016700 -3.63603700 -1.49382100  
C 0.49803200 3.82459000 -0.34682500  
H -0.46726100 3.36654100 -0.17012600  
C -1.38179400 0.81918000 3.28924500  
C 1.89737300 5.78624100 -0.53471900  
C 4.81584000 -3.63314800 -0.83894100  
H 4.82193300 -4.67791300 -0.54516100  
C -0.78882100 -0.13034500 4.11438700  
B -0.33185900 -0.19780000 -0.35183400  
C -0.02249300 -1.13814000 3.54397900  
C 0.64339200 5.20767200 -0.31816900  
H -0.21965200 5.83619000 -0.12335800  
H 2.00837300 6.86595300 -0.51287600

#### Compound 4

S 0.94953500 1.82276100 -1.28382100  
F 0.70666000 -2.59179900 -1.83266600  
F 3.73737200 0.79002600 -0.40443800  
O -0.38927600 -0.51563500 -0.61807100  
F 0.79582800 -2.20024700 1.31102700  
F 2.73526200 -3.94617700 -2.88495400  
F 5.29036700 -2.99034100 -2.73302300  
F 1.65897400 2.48608100 1.51718900  
F 5.77012100 -0.60355300 -1.47517000  
F 1.13669300 -2.35717700 3.95969800  
F 1.74786500 -0.11594200 5.41084700  
F 2.00302100 2.28818200 4.13452800  
C 1.18839300 0.14923200 1.26384500  
C -0.93556300 3.79157500 -1.09772000

C -1.52273800 0.10090100 -0.42878200  
C -1.62831300 1.50396900 -0.40793800  
H -2.57625700 1.93504800 -0.11689200  
C -0.63649500 2.36419000 -0.87189100  
C -2.21064800 4.19520600 -1.54201800  
H -2.96861000 3.44953200 -1.75583900  
C 1.93076200 -2.04104300 -1.71578100  
C 2.12089200 -0.81658800 -1.07008300  
C 2.97712000 -2.77458400 -2.27480900  
C 1.08015100 -1.05372100 1.97237300  
C 4.27872600 -2.29450400 -2.19797000  
C 3.44832900 -0.38360100 -1.01395300  
C -2.49014800 5.54200000 -1.75427500  
H -3.47162800 5.83719400 -2.11132800  
C 1.51117400 1.25575500 2.05238500  
C 0.04666000 4.77501900 -0.87002100  
H 1.02107500 4.47806200 -0.49862300  
C 4.51913100 -1.08233800 -1.55992100  
C -1.50859900 6.50893100 -1.51844700  
H -1.73055400 7.55909300 -1.68091500  
C 1.25739700 -1.16932700 3.34655600  
C -0.24220300 6.12191700 -1.07369700  
H 0.51950100 6.87008300 -0.87882400  
C 1.57121200 -0.03414900 4.08612500  
B 0.96292300 0.07955000 -0.36171800  
C 1.69971300 1.18439400 3.43280300  
C -2.68314400 -0.78699600 -0.28220800  
C -3.98466700 -0.32201400 -0.43434300  
C -2.46277100 -2.16909300 0.00833700  
C -5.09361100 -1.18778400 -0.29102400  
H -4.17861100 0.71316000 -0.69350600  
C -3.52301200 -3.02620700 0.15431600  
H -1.44520600 -2.51965200 0.12536600  
C -6.43024500 -0.72349300 -0.44466800  
C -4.86428300 -2.57089300 0.01251900  
H -3.34872100 -4.07298200 0.38617600  
C -7.49122000 -1.58753500 -0.29792800  
H -6.59791400 0.32434900 -0.67680800  
C -5.98026900 -3.43434600 0.15770000  
C -7.26333000 -2.95328700 0.00620100  
H -8.50826700 -1.22679100 -0.41435800  
H -5.80769900 -4.48135900 0.38951500  
H -8.10994200 -3.62355600 0.11888700

#### Compound 5

S 2.10262500 0.60529600 -0.87042400  
O -0.23497300 -0.88493300 -0.44560800

C 1.47048400 -1.15291000 1.46108500  
C 1.34786200 3.20856600 -0.43964700  
C -0.94018100 0.17849400 -0.17991800  
C -0.35629500 1.45330000 -0.00490800  
H -0.99818800 2.25396100 0.33500900  
C 0.94028300 1.78737000 -0.37983700  
C -2.38806600 -0.03281700 -0.13211300  
C 0.42064600 4.20808500 -0.79609300  
H -0.59324100 3.93254600 -1.06516400  
C 1.16785600 -2.67777700 -2.20655300  
C 1.79916700 -2.28751600 -1.00980200  
C 1.65221900 -3.73032000 -2.98602700  
C 0.47242400 -1.69240000 2.29527100  
C 2.80000600 -4.42289800 -2.59196700  
C 2.94839300 -3.00668800 -0.63431000  
C 0.80543000 5.54510900 -0.85076600  
H 0.08169800 6.30053800 -1.14018400  
C 2.68072600 -0.78977800 2.08116200  
C 2.67038300 3.59146200 -0.14514700  
H 3.39061100 2.83497300 0.14631200  
C 3.44864600 -4.05496100 -1.41139200  
C -3.31052800 1.03065600 -0.08672300  
H -2.96894300 2.05859200 -0.10728500  
C -4.67951000 0.80231100 -0.03949300  
H -5.35717600 1.64574100 -0.00941500  
C 2.11890200 5.91170600 -0.54542100  
H 2.41604800 6.95513300 -0.58534500  
C -2.89876300 -1.35214800 -0.14578200  
H -2.20668400 -2.18431300 -0.18887700  
C 0.66488900 -1.85613500 3.66944200  
C -5.16519900 -0.51639700 -0.04319800  
C 3.04863400 4.93104400 -0.19166800  
H 4.06874300 5.20977500 0.05318300  
C 1.87740900 -1.48748300 4.25588000  
B 1.24077000 -1.05245900 -0.13626900  
C 2.88812100 -0.95407200 3.45315100  
C -4.25776800 -1.59233500 -0.10001400  
H -4.64980800 -2.60360700 -0.10311600  
O -6.47154000 -0.85192100 0.00142300  
C -7.45264200 0.18958800 0.06546100  
H -8.41686300 -0.31617600 0.10005600  
H -7.32462500 0.79696800 0.96706500  
H -7.40661800 0.83009200 -0.82106500  
H 3.47860700 -0.35829200 1.48137500  
H 3.83640600 -0.66011100 3.89580300  
H -0.47984800 -1.99120800 1.86457900  
H -0.13173700 -2.27096200 4.28182900  
H 2.03223100 -1.61259200 5.32397100

H 0.27599300 -2.14808200 -2.53080900  
H 1.13625000 -4.00937000 -3.90128500  
H 3.18195500 -5.24106400 -3.19641200  
H 4.34030300 -4.58834300 -1.09189400  
H 3.45996400 -2.74815700 0.28924100

### Compound 6

S -1.94250000 -0.08690600 -0.85245500  
O 0.72026600 0.69605100 -0.44509500  
C -0.83720000 1.44155500 1.46193600  
C -1.93664800 -2.79544900 -0.42745700  
C 1.09951400 -0.52002100 -0.17619200  
C 0.18919700 -1.58100100 0.00434800  
H 0.58629700 -2.52822000 0.34120500  
C -1.15316400 -1.54255400 -0.36644000  
C 2.55672300 -0.71965100 -0.12888500  
C -1.32159200 -4.01177600 -0.78595700  
H -0.27139300 -4.02708800 -1.05613100  
C -0.17507900 2.76381100 -2.24997100  
C -0.84329800 2.60580000 -1.02025700  
C -0.34660900 3.90152600 -3.04096400  
C 0.27406700 1.65981800 2.29864300  
C -1.20854800 4.91976600 -2.62505700  
C -1.69963700 3.64892700 -0.62412800  
C -2.06128100 -5.18990300 -0.84261600  
H -1.57500900 -6.11548300 -1.13411200  
C -2.10250000 1.45461300 2.07859300  
C -3.31346900 -2.79796700 -0.13191900  
H -3.79611200 -1.87258200 0.16241200  
C -1.88710300 4.78799900 -1.41197700  
C 3.14541800 -1.99906700 -0.09531100  
H 2.53269600 -2.89201500 -0.12890800  
C 4.52660900 -2.14090500 -0.04836800  
H 4.95770500 -3.13758300 -0.02963100  
C -3.42470600 -5.17933500 -0.53623900  
H -3.99871900 -6.09988400 -0.57717900  
C 3.40644800 0.40464200 -0.13076400  
H 2.97040500 1.39571700 -0.16853100  
C 0.13519000 1.87272500 3.67261700  
C 5.37417400 -1.02176100 -0.03634700  
C -4.04714900 -3.98060200 -0.17987600  
H -5.10422900 -3.96713800 0.06618500  
C -1.13350500 1.88061700 4.25574200  
B -0.64898800 1.27310900 -0.13425200  
C -2.25524300 1.67236900 3.45013300  
C 4.78594800 0.25212300 -0.08477600

H 5.42048300 1.13376900 -0.08511000  
C 6.86981500 -1.18310100 0.04729600  
H 7.19715300 -2.11965400 -0.41204200  
H 7.19695500 -1.20158900 1.09433400  
H 7.38901800 -0.35399100 -0.44085300  
H 1.27322900 1.66232600 1.87071700  
H 1.01749100 2.03174800 4.28737100  
H -1.24680800 2.04540800 5.32364600  
H -3.24914900 1.67355400 3.89022200  
H -2.99120700 1.28065800 1.47644300  
H 0.49655100 1.98047200 -2.59147700  
H 0.18979000 3.99381100 -3.98197100  
H -1.34691000 5.80604700 -3.23824200  
H -2.55761000 5.57469700 -1.07563500  
H -2.22605200 3.57438000 0.32375400

#### Compound 7

S 0.47800300 -1.60385600 -0.85874100  
O -0.84137600 0.83503400 -0.43671800  
C -1.24842900 -0.85597500 1.45938400  
C 3.12505100 -1.03860600 -0.43063700  
C 0.26961900 1.45499100 -0.16362600  
C 1.49493900 0.78574400 0.01492500  
H 2.33875300 1.36924700 0.35522900  
C 1.73688900 -0.53428900 -0.36529900  
C 0.16170400 2.92595800 -0.10978300  
C 4.18684300 -0.18008000 -0.77990900  
H 3.98320000 0.85267000 -1.04050800  
C -2.69847500 -0.43906300 -2.23442700  
C -2.38440100 -1.08821900 -1.02475000  
C -3.77469800 -0.84088600 -3.02814500  
C -1.70062800 0.17758200 2.30195700  
C -4.56905600 -1.92138100 -2.63568700  
C -3.20470600 -2.16821400 -0.65142900  
C 5.49311700 -0.65758400 -0.84026700  
H 6.29739800 0.01350700 -1.12456400  
C -0.99129300 -2.09859900 2.06859200  
C 3.41390000 -2.38767600 -0.14785400  
H 2.60923000 -3.05514200 0.14005100  
C -4.27818100 -2.58602800 -1.44268900  
C 1.29524400 3.76179900 -0.08749200  
H 2.29300000 3.34237700 -0.13437300  
C 1.15000000 5.14464200 -0.03120300  
H 2.03212700 5.77640600 -0.01706300  
C 5.76637400 -1.99624200 -0.54644900  
H 6.78636100 -2.36542100 -0.58973800

C -1.11738600 3.51669600 -0.09107900  
H -1.99314200 2.87966600 -0.11725500  
C -1.88077600 -0.01218100 3.67450000  
C -0.12440300 5.71764800 -0.00292800  
C 4.72339900 -2.85828500 -0.19922900  
H 4.93037400 -3.89720500 0.03718000  
C -1.61784100 -1.25683000 4.25021500  
B -1.12274900 -0.62608500 -0.13510400  
C -1.17331600 -2.30292700 3.43865000  
C -1.25711700 4.89966200 -0.03612900  
H -2.24864600 5.34042800 -0.01662700  
H -0.23362500 6.79682300 0.04100700  
H -3.00638500 -2.69008800 0.28108100  
H -4.89085000 -3.42565300 -1.12456600  
H -5.40614100 -2.23908700 -3.25127600  
H -3.99300500 -0.31326300 -3.95315500  
H -2.08956300 0.40110000 -2.55779100  
H -0.63003200 -2.92590800 1.46221800  
H -0.96234500 -3.27677900 3.87290200  
H -1.75597200 -1.40946600 5.31698400  
H -2.22571600 0.81185100 4.29383800  
H -1.91655100 1.15583900 1.88027900

#### Compound 8

S 2.24756500 0.88677600 -0.86631000  
O 0.18758500 -0.96746800 -0.43162300  
C 1.93298100 -0.96075100 1.45807700  
C 1.08047700 3.32919000 -0.42930700  
C -0.67549500 -0.03148500 -0.16227100  
C -0.31027200 1.31747600 0.01712000  
H -1.07334300 2.00001100 0.36413400  
C 0.91406100 1.86130800 -0.36625900  
C -0.00387500 4.16178500 -0.77188500  
H -0.96193400 3.72289300 -1.02799800  
C 1.86399400 -2.46395700 -2.24066500  
C 2.41731100 -2.01727300 -1.02500100  
C 2.50234500 -3.41969700 -3.03353200  
C 1.03404700 -1.63522900 2.30633900  
C 3.73054800 -3.95329900 -2.63428000  
C 3.65115000 -2.57581400 -0.64534200  
C 0.15498100 5.54361500 -0.83078800  
H -0.68689500 6.16929800 -1.10984300  
C 3.08555600 -0.42284800 2.06116300  
C 2.32611300 3.92474300 -0.15202700  
H 3.16462800 3.29768000 0.13009600  
C 4.30457100 -3.52537000 -1.43560500

C 1.39432500 6.12154300 -0.54265100  
H 1.51497900 7.19958700 -0.58522300  
C 1.26520700 -1.76207200 3.67853300  
C 2.47776300 5.30806300 -0.20223400  
H 3.44092600 5.75152400 0.02966500  
C 2.41830500 -1.21832100 4.24805100  
B 1.67564900 -0.89594800 -0.13603000  
C 3.33137500 -0.54828900 3.43073500  
C -2.07732500 -0.48219700 -0.11177500  
C -3.14067100 0.41307300 -0.10973500  
C -2.35241400 -1.88425300 -0.08216400  
C -4.48125300 -0.03596800 -0.05711500  
H -2.96970700 1.48205700 -0.17001600  
C -3.64305200 -2.34482100 -0.03117700  
H -1.52193900 -2.57904500 -0.09780800  
C -5.57506900 0.87447600 -0.05103700  
C -4.74524900 -1.44481700 -0.01372600  
H -3.83895300 -3.41276400 -0.00168800  
C -6.86993400 0.41115300 0.00142700  
H -5.37014700 1.94067200 -0.08597400  
C -6.09134700 -1.88920100 0.04005200  
C -7.12913400 -0.98178300 0.04782700  
H -7.69941700 1.11118800 0.00759500  
H -6.29142300 -2.95629900 0.07408200  
H -8.15566100 -1.33293100 0.08859100  
H 3.80535600 0.11644900 1.44990300  
H 4.23236700 -0.11780200 3.86014400  
H 2.60253000 -1.31397900 5.31449100  
H 0.54480000 -2.28490100 4.30245400  
H 0.13025000 -2.07200500 1.88933900  
H 4.10854800 -2.26897000 0.29157000  
H 0.91112500 -2.05742300 -2.56936200  
H 2.04374700 -3.74708200 -3.96316400  
H 4.23215100 -4.69558800 -3.24911100  
H 5.25794000 -3.93538300 -1.11227300

## References

1. A. C. Murali, P. Nayak, R. Panda, R. Das and K. Venkatasubbaiah, *ACS Appl. Opt. Mater.*, 2023, **1**, 1033-1042.
2. M. Sheik-Bahae, A. A. Said, T.-H. Wei, D. J. Hagan and E. W. Van Stryland, *IEEE J. Quantum Electron.* 1990, **26**, 760–769.
